## **Inhibition of SARS-CoV-2 spike protein palmitoylation reduces virus infectivity**

**Ahmed A. Ramadan<sup>1</sup>, Karthick Mayilsamy<sup>1,2</sup>, Andrew R. McGill<sup>1,2,3</sup>, Anandita Ghosh<sup>1</sup>, Marc A. Giulianotti<sup>4</sup>, Haley M. Donow<sup>4</sup>, Shyam S. Mohapatra<sup>1,2,3</sup>, Subhra Mohapatra<sup>1,2</sup>, Bala Chandran<sup>1</sup>, Robert J. Deschenes<sup>1</sup>, Arunava Roy<sup>\*1</sup>**

<sup>1</sup>Department of Molecular Medicine, University of South Florida, Tampa, FL 33612

<sup>2</sup>Department of Internal Medicine, University of South Florida, Tampa, FL 33612

<sup>3</sup>Department of Veterans Affairs, James A Haley Veterans Hospital, Tampa, FL, 33612

<sup>4</sup>Center for Translational Science, Florida International University, Port St. Lucie, FL

34987

\* Address correspondence to Arunava Roy, Department of Molecular Medicine, University of South Florida, 12901 Bruce B. Downs Blvd., MDC 4138, Tampa, FL 33612, USA, Tel.: (813) 974-5540; Fax: (813) 974-7357

---

**Keywords:** SARS-CoV-2, Palmitoylation, S-acylation, Spike, Posttranslational modification, DHHC9, Bis-piperazine, Antiviral

## 1 **Abstract**

2 Spike glycoproteins of almost all enveloped viruses are known to undergo post-  
3 translational attachment of palmitic acid moieties. The precise role of such palmitoylation  
4 of the spike protein in membrane fusion and infection is not completely understood. Here,  
5 we report that palmitoylation of the first five cysteine residues of the c-terminal cysteine-  
6 rich domain of the SARS-CoV-2 spike are indispensable for infection and palmitoylation  
7 deficient spike mutants are defective in trimerization and subsequent membrane fusion.  
8 The DHHC9 palmitoyltransferase interacts with and palmitoylates the spike protein in the  
9 ER and Golgi, and knockdown of DHHC9 results in reduced fusion and infection of SARS-  
10 CoV-2. Two bis-piperazine backbone-based DHHC9 inhibitors inhibit SARS-CoV-2 spike  
11 protein palmitoylation and the resulting progeny virion particles released are defective in  
12 fusion and infection. This establishes these palmitoyltransferase inhibitors as potential  
13 new intervention strategies against SARS-CoV-2.

## 1 Introduction

2           The last two decades have seen the emergence of three major coronavirus (CoV)  
3 outbreaks. The first was the Severe Acute Respiratory Syndrome-CoV (SARS-CoV) in  
4 2002, then Middle East Respiratory Syndrome-CoV (MERS-CoV) in 2012 and most  
5 recently, the SARS-CoV-2 virus causing the COVID-19 pandemic.  $\beta$ -Coronaviruses are  
6 enveloped, positive-stranded RNA viruses that express a spike protein on the surface  
7 giving the virus the appearance of a crown or corona, in Latin. The SARS-CoV-2 spike  
8 glycoprotein (S) is a 1273 amino acids type I membrane protein that binds to the ACE2  
9 receptor on the host cell to initiate infection, viral uptake, and cell-cell fusion (1, 2).  
10 Structurally, the unprocessed S protein precursor consists of an N-terminal signal  
11 sequence for endoplasmic reticulum (ER) insertion and a large ectodomain (ER luminal -  
12 virion exterior) composed of glycosylation sites, a receptor binding domain (RBD), a  
13 trimerization domain, and two proteolytic cleavage sites (S1/S2 and S2') that are required  
14 for the conformational changes that present the fusion peptide domain for membrane  
15 insertion (3, 4). On the cytosolic side of the single membrane spanning domain is a short  
16 endodomain that contains a cysteine rich domain (CRD) capable of undergoing S-  
17 acylation/palmitoylation (5, 6).

18           Protein palmitoylation is the reversible posttranslational addition of palmitate, from  
19 palmitoyl-CoA, onto the side chain of cysteine residues via a thioester linkage (7). The  
20 reaction is catalyzed by a family of palmitoyl-acyltransferases (PATs) containing a  
21 consensus DHHC (Asp-His-His-Cys) sequence (8, 9). While originally described as a lipid  
22 anchor for peripheral membrane yeast proteins Ras2 and Yck2 (10, 11), palmitoylation is  
23 now known to be a common posttranslational modification that occurs on more than 30%

1 of all cellular proteins (12). Palmitoylation regulates membrane association, trafficking,  
2 vesical fission and fusion, and protein stability (13, 14). Palmitoylation of viral proteins  
3 has been implicated in replication, viral assembly, budding, and cell fusion (15). For  
4 example, palmitoylation of murine coronavirus (MHV) spike is essential for virion  
5 assembly and infectivity (16). Moreover, a palmitoylation deficient recombinant MHV virus  
6 was shown to be deficient in cell fusion and syncytia formation (17). Similar results were  
7 observed in SARS-CoV, where mutagenesis of the first five cysteines of the C-terminal  
8 CRD leads to a palmitoylation deficient spike protein with reduced syncytia formation  
9 ability (18, 19).

10 In SARS-CoV-2 infected cells, the S protein is synthesized on rough endoplasmic  
11 reticulum (RER) where they are co-translationally embedded into the ER membrane via  
12 its N-terminal ER retention signal (20). Subsequently, the S protein trimerizes and are  
13 trafficked to the ER-Golgi intermediate compartment (ERGIC), the Golgi network and ER  
14 derived double membrane vesicles (DVM) where nascent virion particle assembles by  
15 budding into these membranous structures. A C-terminal membrane-spanning ER  
16 retrieval signal (ERRS) prevents the S protein from being fully released into the lumen of  
17 the ER via the secretory pathway (21, 22). During its passage through the secretory  
18 pathway, the S protein is folded, post-translationally modified, and cleaved at the S1/S2  
19 cleavage site by furin or furin-like proteases (23, 24). Eventually, membrane-bound carrier  
20 proteins transfer the newly-assembled virions to the plasma membrane for egress (25).  
21 In addition to this, a fraction of spike traverses the secretory pathway to the plasma  
22 membrane, where they bind ACE2 on uninfected cells leading to multinucleated syncytia  
23 (23). This allows for cell-cell spread of the virus without the release of virion particles and

1 also serves to shield the virus from immune detection (23). In the case of SARS-CoV S  
2 protein and the influenza virus HA protein, palmitoylation of viral glycoproteins has been  
3 shown to precede proteolytic cleavage and glycosylation, but not trimerization which  
4 occurs in the ER (15). This suggests that palmitoylation of viral glycoproteins occurs in  
5 the late ER, ERGIC and the cis-Golgi cisternae, followed by furin cleavage and  
6 glycosylation in the trans-Golgi (15). Evidence that this is may hold true for SARS-CoV-2  
7 also, has recently been reported (26).

8 Protein palmitoylation is carried out by a family of 23 mammalian DHHC proteins  
9 (8). However, information on which of these PATs palmitoylate CoV S proteins has been  
10 sparse. Pull-down experiments by Gordon et al. identified DHHC5 palmitoyltransferase  
11 and its auxiliary protein, Golga7 as interacting with the SARS-CoV-2 spike protein (27).  
12 Recent observations made by Wu et al. and others have indicated that DHHC5 is  
13 associated with the palmitoylation of SARS-CoV-2 S protein (6, 28, 29). In contrast,  
14 Masquita et al. recently reported that SARS-CoV-2 S protein is mainly palmitoylated by  
15 DHHC20, but DHHC8 and 9 also play a role (26). A metabolic modeling study by Santos-  
16 Beneit et al. designed to identify potential anti-COVID drug targets identified protein  
17 palmitoylation as a prominent target (30). These studies provide support to the notion that  
18 inhibitors of PATs may be developed as potential anti-viral drugs (31). The unmet  
19 challenge to date is to develop high affinity, specific, PAT inhibitors. The most widely used  
20 inhibitor, 2-bromopalmitic acid (2-BP) is a non-metabolizable palmitate analog with no  
21 detectable preference toward any specific DHHC PAT (32). Moreover, 2-BP is also known  
22 to inhibit other lipid metabolizing enzymes (33). We have previously reported more  
23 specific PAT inhibitors based on a Bis-piperazine scaffold (34). In this report, we show

1 that these novel compounds inhibit palmitoylation of SARS-CoV-2 spike proteins resulting  
2 in reduced virus infectivity.

3 Here, we present our studies on the role of palmitoylation of the SARS-CoV-2 spike  
4 protein using a pseudotyped luciferase lentivirus system as well as SARS-CoV-2 virus  
5 infection. We employ a number of CRD cysteine mutants of the spike protein to evaluate  
6 the propensity of different cysteine clusters to be palmitoylated. We then evaluate the role  
7 of spike palmitoylation on trimerization, S1/S2 furin cleavage, transport through the  
8 secretory pathway, release on mature virion particles, binding to the ACE2 receptor, cell-  
9 cell syncytia formation and infection. We identify DHH9 as a PAT palmitoylating the  
10 SARS-CoV-2 spike protein and demonstrate its co-localization and physical interaction  
11 with the spike protein in transfected cells as well in SARS-CoV-2 infected cells. Finally,  
12 we extended our studies to include SARS-CoV-2-mNG (SARS-CoV-2 stably encoding  
13 mNeonGreen) and show that PAT inhibitors also reduce SARS-CoV-2 infection and  
14 syncytia formation. Together, these results establish DHH9 as a potential target against  
15 SARS-CoV-2 and identify lead compounds for the intervention of the SARS-CoV-2  
16 lifecycle and infectivity.

## 17 **Results**

### 18 **SARS-CoV-2 spike protein is palmitoylated on multiple sites.**

19 Cysteines in close proximity to transmembrane helices have higher propensity to  
20 be palmitoylated (35). The C-terminal CRD of SARS-CoV-2 spike protein has 10 highly  
21 conserved juxtamembrane cysteine residues, 9 of which were predicted to be potential  
22 sites of palmitoylation by the palmitoylation prediction server at  
23 <http://csspalm.biocuckoo.org/online.php> (36) (Fig. 1A). To investigate the role of

1 palmitoylation at these 10 Cysteine residues, we grouped them into 4 clusters - C1  
2 (C1235, 1236), C2 (C1240, C1241, 1243), C3 (C1247, 1248, 1250) and C4 (C1253,  
3 1254), and mutated each cluster to serine (Fig. 1A). We also generated a  $\Delta$ C mutant in  
4 which all 10 cysteines were mutated to serine. The Acyl-PEGyl Exchange Gel-Shift  
5 (APEGS) Assay was used to assess the palmitoylation of wild-type (WT) and cysteine  
6 mutant S proteins, which employs mPEG-maleimide alkylation to label palmitoylated  
7 cysteine residues to study the effect of these mutations on the palmitoylation of the S  
8 protein. After PEGylation, the samples were separated by SDS-PAGE and visualized by  
9 chemiluminescence using a monoclonal antibody specific for the S2 fragment of the Spike  
10 protein. The mPEG minus APEGS reactions served as a control and confirmed the  
11 observed gel shifted palmitoylated bands were due to PEGylation at the available  
12 cysteine residues. The C1, C2, and C4 cysteine clusters reduced palmitoylation  
13 significantly, whereas the  $\Delta$ C mutation led to undetectable levels of palmitoylation (Fig.  
14 1B). Mutating the C3 cluster appears to be less important for palmitoylation (Fig. 1B).  
15 The S protein shifted to several higher molecular weight bands representing different  
16 populations of the spike protein with varying degrees of palmitoylation (Fig. 1B). GAPDH,  
17 which is also known to undergo palmitoylation (37) was used as a positive control for the  
18 APEGS reaction and as a loading control to show equal protein loading per well.

19 Next, we employed a luciferase reporter SARS-COV-2 spike pseudotyped  
20 lentivirus system to study the effect of these cysteine cluster mutations on the cellular  
21 entry and infectivity of the S protein by measuring the luciferase activity 48 h after  
22 pseudovirus infection of HEK293T-ACE2 or Caco-2 cells (Fig. 1C). Compared to S WT,  
23 the  $\Delta$ C mutant was highly defective in infection of HEK293T-ACE2 cells (Fig. 1D).

1 Clusters C1 and C2 mutations were also defective in infection to levels similar to the  $\Delta C$   
2 mutant (Fig. 1D). In contrast, clusters C3 and C4 mutations had almost no diminution of  
3 pseudovirus entry. Similar results were observed with Caco-2 cells which expresses ACE-  
4 2 endogenously (Fig. 1E). Together, these data indicate that the first five cysteine  
5 residues of the SARS-CoV-2 spike protein CRD (C1235, 1236, 1240, 1241 and 1243) are  
6 the most functionally important residues to be palmitoylated for infection of ACE-2  
7 expressing cells.

### 8 **Mutation of Cluster C2 (C1240, C1241, 1243) of S protein abrogates trimerization**

9 Next, to investigate if the observed reduction in the infectivity of the C1, C2 and  
10  $\Delta C$  mutant pseudotyped lentiviruses are due to defects in the intracellular processing of  
11 the nascent S protein, we tested its trimerization and intracellular furin cleavage at the  
12 S1/S2 site by resolving the WT and the mutant S proteins expressed in 293T cells on  
13 native-PAGE. Relative band intensities of the three forms of the S protein – S2 fragment,  
14 full length, and trimer were normalized to WT being 1.0. As shown in Fig. 2A and B,  
15 compared to the WT protein, mutants C2 and  $\Delta C$  were severely defective in trimer  
16 formation. Spike protein trimerization is known to be essential for its membrane fusion  
17 and thus, infection ability (38). Furin mediated cleavage at the S1/S2 site of the spike  
18 protein is a gain-of-function unique to SARS-CoV-2, which is absent in SARS-CoV and  
19 other SARS-related coronaviruses (39). There was no detectable difference in spike furin  
20 cleavage between WT and the mutants (Fig. 2A and B).

21 Lentivirus based pseudotyped virus assembly and budding occurs at the host  
22 plasma membrane. Therefore, we investigated the effect of the cysteine cluster mutations  
23 on the transport of the S protein to the plasma membrane. For this, we performed surface



1 immunofluorescence assay (SIF) and immunostained the S protein on non-permeabilized  
2 cells. We found that only the  $\Delta C$  mutant exhibited moderate reduction in its surface  
3 expression, while the rest of the cysteine cluster mutations had no measurable effect (Fig.  
4 2C). This indicates that the reduced infectivity of the C1 and C2 mutant pseudotyped  
5 lentivirus is not due to defects in their ability to be transported to the plasma membrane.

6         Next, we tested the effect of these mutants on the packaging and egress of the S-  
7 pseudotyped lentivirus particles. For this, we collected cell-free S-pseudotyped lentivirus  
8 supernatants and compared their egress by performing ELISA against the lentivirus  
9 capsid protein, p24. Our results show that none of the cysteine cluster mutants had any  
10 effect on the egress of the pseudotyped lentivirus (Fig. 2D). However, the  $\Delta C$  mutant  
11 showed a moderate, but significant reduction, indicating that only mutating all 10  
12 cysteines has a measurable effect on pseudotyped lentivirus egress.

13         The effect of spike palmitoylation on ACE2 receptor binding was examined by co-  
14 immunoprecipitation. ACE2 was immunoreacted with anti-ACE2 antibody followed by  
15 detection of spike by immunoblotting with anti-spike antibody. There appeared to be no  
16 difference in ACE2 binding comparing WT to the cysteine cluster mutants (Fig. 2E).  
17 Together, these experiments establish that  $\Delta C$ , and to a lesser extent C1 and C2 exhibit  
18 reduced trimerization of the spike protein, whereas furin cleavage, cell surface  
19 localization, pseudovirus egress, and ACE2 binding remains unaltered.

## 20 **Mutating the CRD diminishes S protein mediated membrane fusion and syncytia** 21 **formation**

22         CoV spike proteins play an indispensable role in the fusion between the viral  
23 envelope and the target cell membrane, or between an infected cell and an uninfected

1 cell membrane (40, 41). Both are essential steps in virus infection and entry, and in cell  
2 to cell spread and pathogenesis. Therefore, we investigated the effect of the cysteine  
3 cluster mutations on the fusogenic potential of the SARS-CoV-2 S protein. For this, we  
4 transfected HEK293T-EGFP (HEK293T cells stably transfected with EGFP) with S WT or  
5 its mutant plasmids. 293T-ACE2 cells were stained with a red cell tracker dye and 6 h  
6 later, the two cells were mixed at 1:1 ratio, and co-cultured together. When the GFP+S  
7 expressing cells and the ACE2 expressing red cells fuse and form a syncytium, it will  
8 appear as yellow under a fluorescent microscope (Fig. 3A). First, we compared S WT to  
9 the  $\Delta$ C mutant and observed that the palmitoylation deficient spike protein exhibited a  
10 marked reduction in syncytia formation (Fig. 3B and C). Subsequently, we tested all the  
11 cysteine cluster mutants and, consistent with our pseudovirus infection observations (Fig.  
12 1D and E), we observed that C1 and C2 cluster mutations have the greatest effect on  
13 syncytia formation (Fig. 3D and E). C3 and C4 clusters had lower, but significant effects  
14 on syncytia formation. These results collectively show that the first 5 cysteines of the  
15 SARS-CoV-2 S CRD (C1235, 1236, 1240, 1241, 1243) play the most important role in  
16 fusogenic activity.

### 17 **Reducing DHHC9 levels decreases SARS-CoV-2 spike palmitoylation**

18 Since palmitoylation of the S protein is an indispensable step for CoV infection, we  
19 sought to identify the DHHC PAT responsible for palmitoylating the spike CRD. Gordan  
20 et.al found that the SARS-CoV-2 spike protein interacts with DHHC5 and Golga7 (27).  
21 Golga7 has been previously identified as an accessory protein of DHHC9 and DHHC5  
22 (42, 43). We thus knocked down DHHC5 and DHHC9 individually using siRNA in  
23 HEK293T cells and 72h later confirmed their knock down efficiencies using RT-PCR and

1 WB (Fig 4A and B). We found that both enzymes were knocked down efficiently.  
2 Interestingly, knock down of DHHC5 led to a 1.8-fold upregulation of DHHC9 (Fig. 4A),  
3 whereas knock down of DHHC9 did not affect DHHC5 expression. The change in mRNA  
4 levels resulted in commensurate changes in protein levels (Fig. 4B). To examine this  
5 further, we measured mRNA levels of a panel of DHHC genes following knock down of  
6 DHHC5 and DHHC9. Knock down of DHHC5 resulted in a compensatory upregulation  
7 of DHHC9, 15 and 20 (Fig. S1). However, knock down of DHHC9 did not result in any  
8 such compensatory upregulation of any other PAT (Fig. S1).

9 The APEGS assay was used to examine the palmitoylation of the spike protein  
10 following knock down of DHHC5 or DHHC9. Reduction of DHHC9 significantly reduced  
11 spike palmitoylation (Fig 4C). In contrast, in DHHC5 knocked down cells S protein  
12 palmitoylation increased, presumably due to the increase in DHHC9, but we cannot rule  
13 out that DHHC15 and DHHC20 may also contribute since they are similarly upregulated  
14 in a DHHC5 knockdown (Fig. S1). As expected, palmitoylation of GAPDH was unaffected  
15 upon knockdown of both DHHC5 or DHHC9 (44) (Fig 4C, lower pane).

16 To evaluate the effect of DHHC5 and DHHC9 down regulation on the ability of S  
17 protein pseudotyped lentivirus to infect ACE2 bearing cells, we generated lentivirus  
18 particles from cells in which DHHC5 and 9 levels have been knock down. Reduction of  
19 DHHC9, but not DHHC5, resulted in a significant reduction in infection of HEK293T-ACE2  
20 cells (Fig. 4D). In contrast, knock down DHHC9 or DHHC5 in the HEK293T-ACE2 cells  
21 had no effect on the infection by pseudovirus derived from untreated cells (Fig. 4E). Thus,  
22 S protein palmitoylation is required for infection of HEK293T-ACE2 recipient cells, but not  
23 for any downstream event following infection. We next tested if syncytia formation

1 requires DHHC5 or DHHC9. As seen in Fig. 4F and G, knock down of DHHC9, but not  
2 DHHC5, resulted in significantly reduced syncytial formation.

### 3 **DHHC9 co-localizes and interacts with the SARS-CoV-2 spike protein both in** 4 **transfected and infected cells**

5 To determine whether DHHC9 interacts with the SARS-CoV-2 spike protein, we  
6 performed a Co-IP experiment with FLAG tagged DHHC9 or its catalytic mutant, DHHA9  
7 Mut, in HEK293T cells co-transfected with the spike protein. DHHC9 and the spike protein  
8 physically interact and the interaction was not dependent on the palmitoyltransferase  
9 activity of DHHC9 (Fig. 5A). In contrast, a similar Co-IP experiment with Myc-tagged  
10 Golga7 failed to detect an interaction with the spike protein (Fig. 5B).

11 Next, to examine whether the spike protein interacts with DHHC9 in infected cells,  
12 we performed immunofluorescence experiments in Vero-E6-ACE2 cells infected with  
13 SARS-CoV-2 for 48 h. Co-localization (yellow) with the endoplasmic reticulum marker,  
14 Calnexin and the cis-Golgi marker, GM130 indicates that the S protein localizes to both  
15 the ER and the Golgi apparatus (Fig. 5C). Similar observations were made in HEK293T  
16 cells transfected with FLAG-DHHC9, Myc-Golga7 or the spike protein, where all of these  
17 proteins were found to localize to the ER and the Golgi network (Fig. S2A). Following this,  
18 we performed co-localization experiments between the spike protein and DHHC5 and 9  
19 in SARS-CoV-2 infected Caco-2 cells (Fig. 5D). In agreement with previous observations  
20 (44, 45), we observed DHHC5 to be localized predominantly on the cell surface, but in  
21 addition, some DHHC5 could be observed at other intracellular locations (Fig. 5D).  
22 Because the S protein is primarily localized to the ER and the Golgi, we did not observe  
23 significant co-localization between S and DHHC5 (Fig. 5D, upper panel). However, under

1 similar conditions, DHHC9 extensively co-localized with spike protein (Fig. 5D, lower  
2 panel). To further confirm the spike protein's co-localization with DHHC9 and to exclude  
3 the possible non-specific staining due to the DHHC9 antibody, we performed similar co-  
4 localization experiments in HEK293T cells transfected with FLAG DHHC9 and Myc-  
5 tagged Golga7. Significant co-localization was observed between DHHC9 and the spike  
6 protein (Fig. 5E, top panel). Myc Golga7, also co-localized with the spike protein, albeit  
7 to a lesser degree (Fig. 5E, bottom panel).

8         The proximity ligation assay (PLA) provides a better method to assess direct  
9 interactions (<40nm) between proteins in cells (46). When PLA was performed, we  
10 observed robust interactions between the spike protein and FLAG DHHC9 (Fig. 5F). We  
11 also performed immunofluorescence against Calnexin and GM130 in the same  
12 experiment and found that the PLA signal between the S protein and DHHC9 localizes  
13 partially to the Golgi apparatus, but almost entirely to the ER network (Fig. 5F, arrows).  
14 This suggests that palmitoylation of spike occurs primarily in the ER and secondarily in  
15 the ERGIC, as Calnexin is also found in the ERGIC (47, 48). In a similar experiment,  
16 where PLA was performed between the spike protein and Golga7, we failed to detect a  
17 significant PLA signal, indicating again that spike and Golga7 do not directly interact with  
18 each other (Fig. 5G). The specificity of the PLA signal was confirmed by isotype IgG  
19 controlled PLA reaction which did not produce any signal (Fig. S2B).

## 20 **SARS-CoV-2 infection and syncytia formation in Caco-2 cells requires DHHC9** 21 **dependent palmitoylation of spike protein**

22         Having established that DHHC9 plays a major role in the palmitoylation of the  
23 SARS-CoV-2 spike protein in-vitro using pseudovirus, we directed our attention to study

1 the SARS-CoV-2 virus. SARS-CoV-2-mNG, a fluorescently labeled virus, is based on the  
2 2019-nCoV/USA\_WA1/2020 strain isolated from the first reported SARS-CoV-2 case in  
3 the US (49). SARS-CoV-2-mNG is a recombinant virus in which the mNeonGreen gene  
4 has been inserted into ORF7 of the viral genome. This recombinant virus exhibits similar  
5 plaque morphology, viral RNA profile, and replication kinetics compared to the original  
6 clinical isolate (49). Thus, this virus can be used to determine the efficiency of SARS-  
7 CoV-2 infection and syncytia formation. Caco-2 cells transfected with DHHC9 or DHHC5  
8 siRNA were infected with SARS-CoV-2-mNG and 24, 48 and 72 h post-infection,  
9 monitored for mNeonGreen expression. At 24h post-infection, the mNeonGreen signal  
10 was not measurably reduced after knockdown of DHHC5 or DHHC9 (Fig. 6A, B and S3).  
11 However, at 48 and 72 h post-infection, the mNeonGreen signal in the DHHC9 knocked  
12 down cells reduced significantly. We reason that, as the cells were infected with SARS-  
13 CoV-2-mNG harvested from WT Vero-E6 cells, the S protein on these virus particles were  
14 efficiently palmitoylated and knock down of the respective PATs in the recipient Caco-2  
15 cells had no effect on the infection process and the expression of mNeonGreen at 24 h  
16 post infection. However, with time (48 and 72 h), nascent virion particles increasingly  
17 harbored palmitoylation-deficient spike protein which resulted in reduced mNeonGreen  
18 signal and lower levels of infection of neighboring cells. The size of the syncytia was also  
19 reduced in the DHHC9 knocked down cells compared to the control knocked down cells  
20 at 72 h post-infection (Fig. 6A). There was no measurable change in syncytia formation  
21 after knock down of DHHC5, suggesting that DHHC9 plays a key role in the palmitoylation  
22 of the spike protein during SARS-CoV-2 infection.

## 1 **DHHC9 inhibitors inhibit SARS-CoV-2 spike palmitoylation, fusogenicity and** 2 **infectivity**

3        Having identified DHHC9 as a SARS-CoV-2 spike protein palmitoylating enzyme,  
4 we investigated whether inhibiting DHHC9 would inhibit SARS-CoV-2 infection. The  
5 availability of validated and specific PAT inhibitors are fairly limited (50). 2-bromopalmitate  
6 (2-BP), the most widely used PAT inhibitor promiscuously inhibit a wide range of enzyme  
7 utilizing active site cysteine residues (32, 51-53). Previously, using a scaffold ranking  
8 approach to screen for novel inhibitors of the yeast homolog of DHHC9, members of our  
9 group identified a number of bis-piperazine backbone based compounds (34). Two leads  
10 from this study, compounds 13 and 25, inhibited palmitoylation at low micromolar  
11 concentrations. Compound 13 has the lead functional group, 2-(3,5-bis-  
12 trifluoromethylphenyl)-ethyl, at positions R1 and R3, while compound 25 has 4-tert-butyl-  
13 cyclohexyl-methyl at the R1 position and 2-(3,5-bis-trifluoromethyl-phenyl)-ethyl at  
14 position R3 (Fig. 7A). We evaluated the palmitoylation inhibitory potential of compounds  
15 13 and 25 against the SARS-CoV-2 spike protein.

16        The compounds were first tested for toxicity on HEK293T and Caco-2 cells and  
17 found to have no observable toxicity at concentrations below 3 $\mu$ M (Fig. 7B and C,  
18 respectively). We next examined whether compounds 13 and 25 inhibited the SARS-CoV-  
19 2 spike protein palmitoylation using APEGS assay. Compared to the vehicle control,  
20 compounds 13 and 25 (3 $\mu$ M) reduced palmitoylation of the spike protein in HEK293T cells  
21 by 37% and 44% respectively (Fig. 7D). The non-specific PAT inhibitor, 2-BP, also  
22 inhibited spike palmitoylation, but required 10 $\mu$ M concentration. In the same experiment,  
23 we found that GAPDH palmitoylation is reduced by the non-specific inhibitor, 2-BP, but

1 not by compounds 13 and 25 (Fig. 7D), consistent with the specificity previously observed  
2 for these compounds (34).

3 We next examined the effect of these palmitoyltransferase inhibitors on the cellular  
4 entry and infectivity of SARS-COV-2 spike pseudotyped lentivirus on HEK293T-ACE2  
5 cells. First, we treated the recipient HEK293T-ACE2 with inhibitors and found that there  
6 was no reduction in luciferase signal upon treatment with compounds 13 and 25 (Fig. 7E).  
7 However, 2-BP caused a significant reduction in pseudovirus infection in this experiment,  
8 implying that it interferes with lentivirus endocytosis (Fig. 7E). This also signifies that  
9 compounds 13 and 25 do not affect any step downstream of infection. In a second series  
10 of experiments, HEK293T cells were treated with compounds 13, 25 or 2-BP and  
11 pseudovirus produced from these cells were tested for their ability to infect untreated  
12 HEK293T-ACE2 cells. In this case, we observed a significant reduction in the luciferase  
13 signal (Fig. 7F) indicating that inhibition of spike palmitoylation resulted in a pseudovirus  
14 with reduced ability to infect cells. Under similar conditions, 2-BP also reduced luciferase  
15 signal significantly. We also found that compounds 13 and 25 do not reduce the quantity  
16 of pseudovirus released from the producer cells, indicating that there is no measurable  
17 effect on lentivirus packaging and egress (Fig. 7G). Furthermore, we observed that  
18 inhibition of spike palmitoylation by compounds 13 and 25 reduces its fusogenicity in a  
19 syncytia formation assay. Treatment with compound 13 (1 $\mu$ M and 3 $\mu$ M) resulted in a 58%  
20 and 60% reduction in syncytia formation, respectively. Compound 25 (1 $\mu$ M and 3 $\mu$ M)  
21 similarly reduced syncytia formation by 45% and 50%, respectively (Fig. 7H and I).

22 **Compounds 13 and 25 inhibit SARS-CoV-2 infection in cell culture**



1           We tested the effect of these palmitoyltransferase inhibitors on SARS-CoV-2  
2 infection using the SARS-CoV-2-mNG. Caco-2 cells pretreated with compounds 13, 25,  
3 or 2-BP and infected with SARS-CoV-2-mNG exhibited dose dependent reduction in  
4 mNeonGreen signal after 72 h of infection (Fig. 8A, B and S4). The size of the syncytia  
5 were also reduced in the inhibitor treated cells compared to the control vehicle treated  
6 cells (Fig. 8A). This indicates that compounds 13 and 25 effectively inhibits SARS-CoV-2  
7 spike protein palmitoylation causing a reduction in the infection competent virus released  
8 to subsequently infect neighboring cells.

9           Next, virus containing supernatants were collected 72 h after SARS-CoV-2  
10 infection of Caco-2 cells pre-treated with the inhibitors and used to infect Vero-E6 ACE2  
11 cells. After 24 h, infection was quantitated by measuring the appearance of the SARS-  
12 CoV-2 N gene by real-time RT-PCR. SARS-CoV-2 virus isolated from Caco-2 cells  
13 treated with compounds 13 and 25 resulted in a 60% and 76% reduction viral infection of  
14 Vero-E6 cells (Fig. 8C).

## 15 **Discussion**

16           In this study, we demonstrate that the SARS-CoV-2 spike protein is palmitoylated  
17 on a cluster of conserved cysteines residues on the cytosolic domains of the SARS-CoV-  
18 2 spike protein. Mutating all 10 cysteine residues to serine ( $\Delta$ C) eliminates all detectable  
19 palmitoylation, but mutating individual clusters of cysteines suggests that not all cysteine  
20 residues are palmitoylated equivalently. For example, mutating clusters C1 (C1235,  
21 C1236), C2 (C1240, C1241, C1243), and C4 (C1253, C1254) significantly reduces, but  
22 does not eliminate spike palmitoylation. In contrast, spike palmitoylation is unaffected by  
23 mutating the C3 (C1248, C1249, C1250) cluster. Individual cysteine clusters are also

1 functionally different. Mutating C1 and C2 clusters reduce infection of ACE-2 expressing  
2 cells to the same extent as  $\Delta C$ , indicating that palmitoylation of the juxtamembrane  
3 cysteines are the most important for infection. Mutating the C3 cluster does not reduce  
4 palmitoylation or influence infection. Interestingly, mutating the C4 cluster reduces overall  
5 palmitoylation, but does not reduce infection suggesting that palmitoylation of the C4  
6 cysteines may have other roles in the viral life cycle.

7 Palmitoylation of SARS-CoV-2 spike occurs in the ER and Golgi and results in  
8 partitioning into detergent resistant, cholesterol and sphingolipid rich membrane  
9 microdomains (26). In contrast, palmitoylation defective spike is localized in detergent  
10 soluble membrane fractions and results in 35% less spike on the cell surface. We also  
11 find that the  $\Delta C$  mutant of the spike protein decreases surface expression by 40% and  
12 taken together, these results show that palmitoylation is important, but not essential for  
13 the surface expression of the spike protein. The spike protein appears to be able to  
14 access alternate trafficking routes depending on palmitoylation. We have also shown that  
15 palmitoylation is not required for ACE2 receptor binding. However, despite being capable  
16 of binding ACE2 and a modest decrease in membrane expression, virus harboring non-  
17 palmitoylated spike fail to infect host cells. One reason could be that membrane fusion  
18 depends on surface density of spike proteins (54). Palmitoylation dependent clustering of  
19 the spike protein in infected cell lipid rafts could increase spike density on the membrane  
20 to support membrane fusion. Alternatively, palmitoylation of spike may play a more direct  
21 role in membrane fusion.

22 Since the palmitoylation sites of the SARS-CoV spike protein CRDs are in the  
23 vicinity of the membrane bilayer, it is likely that the cytoplasmic tail folds back creating a

1 membrane anchor. The potential to palmitoylate up to 10 cysteine residues would create  
2 a strong membrane anchor for the endodomains of the spike protein. While it is possible  
3 that changes in the spike protein endodomain via palmitoylation or mutation of the  
4 cysteine residues might destabilize the spike protein resulting in its proteasomal  
5 clearance, we do not think this is the case. First, we find that the wild-type spike protein  
6 and its palmitoylation defective mutants are expressed at approximately the same levels,  
7 and, traffic to the plasma membrane and bind to ACE2 at the same levels. However, we  
8 observed that the  $\Delta C$  and C2 cysteine mutants results in a decrease in spike protein  
9 trimerization. Previous work with the murine coronavirus spike protein has suggested that  
10 trimerization may be important for fusion activity (55) and that the spike protein CRD plays  
11 an important role in its oligomerization (6, 56). Pre-fusion, the spike protein typically exists  
12 in a metastable conformation. Once it interacts with the host ACE2 receptor, extensive  
13 structural rearrangement of the S protein occurs, allowing the virus to fuse with the host  
14 cell membrane (40, 57). This S2 domain directed fusion event requires a concerted  
15 cooperation between the different domains of the spike trimers (58). It is therefore  
16 possible that conformational changes mediated by palmitoylation in the cytoplasmic  
17 endodomain of the spike protein, impact the ability of the extracellular ectodomain to  
18 adopt the proper conformation required for efficient cell fusion, implying a co-operation  
19 between the ecto and endodomains. Alternatively, palmitoylation might simply  
20 concentrate the spike protein in membrane microdomains, thus facilitating trimer  
21 formation. In addition, extensive palmitoylation of the CRD could also be required to  
22 create a stable anchor during the membrane fusion process. One or more of these

1 mechanisms likely results in the failure of non-palmitoylated spike proteins to carry out  
2 efficient membrane fusion.

3 S-acylation of viral proteins requires the host cell palmitoylation machinery that,  
4 depending on the cell type, consists of up to 23 individual DHHC PAT genes. Identification  
5 of the DHHC protein or proteins that palmitoylate the SARS-CoV-2 spike has begun to  
6 emerge from several lines of investigation. First, a comprehensive interactome study  
7 uncovered an interaction between the SARS-CoV-2 spike protein and Golga7, an  
8 auxiliary protein for DHHC5, DHHC9, and possible additional DHHC proteins (27). All  
9 animal reservoirs of coronaviruses express both DHHC9 and DHHC20 (59), and  
10 observations from the knockdown and overexpression of DHHC8, 9, and 20 further  
11 implicate these PATs in the palmitoylation of SARS-CoV-2 spike protein (26). We used  
12 several approaches to show that DHHC9 plays a major role in palmitoylating the SARS-  
13 CoV-2 spike protein. Co-localization and proximity ligation studies confirm that both, the  
14 spike protein and DHHC9, occupy the same spatial compartments inside the cell and they  
15 physically interacts with each other in the ER, Golgi and the ERGIC. Knockdown of  
16 DHHC9 resulted in a decrease in spike protein palmitoylation, pseudovirus fusion,  
17 syncytia formation, and a 55% and 80% reduction of SARS-CoV-2 infection at 48 h and  
18 72 h post inoculation, respectively. Surprisingly, we observed that knockdown of DHHC5  
19 resulted in an increase in palmitoylation of the spike protein. On further investigation, we  
20 found that knockdown of DHHC5 resulted in compensatory upregulation of DHHC9,  
21 DHHC15 and DHHC20 PATs. This suggests that in addition to DHHC9, DHHC15 or  
22 DHHC20 can also palmitoylate the spike protein. Others have also shown that DHHC20  
23 is capable of palmitoylating the SARS-CoV-2 spike protein (5, 26, 60). Among these

1 reports, while Mesquita et al. (26) and Li et al. (60) also found DHHC9 as a potential spike  
2 palmitoylating PAT, Puthenveetil et al. did not identify DHHC9 in their screen (5). In this  
3 context, it is reasonable to assume that spike protein palmitoylation may be carried out  
4 by different DHHC proteins in different cellular compartments during the viral life cycle.

5 Our work and that of several other groups have led to the suggestion that inhibitors  
6 of palmitoylation may be developed into a new class of antivirals (27, 30, 31). To do so  
7 will require identification of high affinity, specific inhibitors of DHHC PATs. This has  
8 proved to be difficult. Commonly used inhibitors such as 2-bromopalmitate show little  
9 specificity, hitting a wide range of thiol containing enzymes (32). We previously developed  
10 a high throughput palmitoylation assay and used it to screen a chemical library consisting  
11 of 68 unique scaffolds and 30 million unique structures for inhibition of the yeast ortholog  
12 of DHHC9 (34). Two compounds based on a bis-piperazine backbone (compounds 13  
13 and 25) were selected to be tested for inhibition of SARS-CoV-2 spike palmitoylation and  
14 viral infection. We found that both compounds decreased spike protein palmitoylation,  
15 pseudovirus infection and syncytia formation. Further, experiments on SARS-CoV-2  
16 infection established the robust inhibitory effect of compounds 13 and 25 on progeny  
17 virion formation. Interestingly, the amino acid sequence of the core domain of DHHC9 is  
18 highly homologous to that of DHHC20 (59). Therefore, it will be interesting to evaluate in  
19 future studies if compounds 13 and 25 inhibit DHHC20 in addition to DHHC9. Because  
20 the spike protein of viruses with zoonotic potential are often found to be palmitoylated by  
21 a similar set of PATs (59), compounds 13 and 25 may also have potential anti-viral effect  
22 on other existing or emerging viruses.

## 1 **Materials and Methods**

### 2 **Plasmids and HIV-1 derived pseudovirus generation**

3 Plasmids used in this study for the production of pseudo-typed virus were a gift  
4 from Jesse D. Bloom's lab (BEI Resources # NR52516, NR52517, NR52518 and  
5 NR52519). The HDM-IDTSpike-fixK (BEI catalog number NR-52514) plasmid expressing  
6 a codon-optimized spike from SARS-CoV-2 strain Wuhan-Hu-1 (Genbank NC\_045512)  
7 under a CMV promoter, was used as the wild-type spike and we performed all the  
8 mutagenesis on this codon-optimized spike clone. Third Generation Lenti-virus EGFP  
9 plasmid, pLJM1-EGFP, was a gift from David Sabatini (Addgene #19319). 3<sup>rd</sup> generation  
10 lentivirus were produced using the flowing packaging plasmids, which were a gift from  
11 Didier Trono's lab, pMDL (Addgene #12251), pRev (Addgene #12253) and pMD2.G  
12 (Addgene #12259) (61).

13 HIV-1 derived virus particles pseudotyped with full length wild-type and mutant  
14 SARS-CoV-2 spike protein were generated by transfecting HEK293T cells as previously  
15 described (62). Briefly, plasmids expressing the HIV-1 gag and pol (pHDM-Hgpm2), HIV-  
16 1 rev (pRC-CMV-rev1b), HIV-1 Tat (pHDM-tat1b), the SARS CoV2 spike (pHDM-SARS-  
17 CoV-2 Spike) and a luciferase/ZsGreen reporter (pHAGE-CMV-Luc2-IRES-ZsGreen-W)  
18 were co-transfected into HEK293T cells at a 1:1:1:1.6:4.6 ratio using CalPhos mammalian  
19 transfection kit (TaKaRa Clontech, Mountain View, CA #631312) according to  
20 manufacturer's instructions. Fresh media was added after 18 hours and 60 hours later,  
21 culture supernatant was collected, clarified by passing through 0.45 um filter and used  
22 freshly.

### 23 **Cell culture**

1 Human female embryonic kidney HEK293T cells (ATCC) were grown in Dulbecco  
2 modified Eagle's medium (DMEM) supplemented with 10% fetal bovine serum (FBS)  
3 (Sigma, #F4135) and Penicillin-Streptomycin (Gibco, #15140148). HEK293T cells  
4 constitutively expressing human ACE2 (HEK293T-ACE2 cells) obtained from BEI  
5 Resources (#NR52511) were grown in the same media supplemented with hygromycin  
6 (100 µg/ml). HEK293T cells constitutively expressing EGFP (HEK293T-EGFP) were  
7 established by transducing HEK293T cells with the pLJM1-EGFP containing lentivirus.  
8 Lentivirus was produced by transfecting  $10^6$  HEK293T cells on a 60 mm plate with pMDL,  
9 pRev and pVSVG using CalPhos mammalian transfection kit (TaKaRa Clontech). Next  
10 day, fresh media was added, then two days after transfection, the supernatant was  
11 harvested, and filtered 0.45-µm filter to remove cell debris. The filtered supernatant  
12 containing lentiviral vectors was used to transduce HEK293T cells seeded one day  
13 before. 48 hours later, the cells were selected in DMEM supplemented with 2 µg/ml  
14 puromycin for one week. The puromycin-resistant population of HEK293T-EGFP cells  
15 was found to constitutively express EGFP by fluorescent microscopy. These HEK293T-  
16 EGFP cells were used as donor cells in syncytium formation assays. Caco-2 (human  
17 colon epithelial cells) cells, obtained from ATCC (HTB-37), were grown in Minimum  
18 Essential Medium (Gibco # 11095080.) media supplemented with 20% fetal bovine serum  
19 (Sigma, #F4135), Penicillin- Streptomycin (Gibco, #15140148), 1x non-essential amino  
20 acid solution (Cytiva, SH3023801) and 10 mM sodium pyruvate (Gibco, # 11360070). All  
21 cell lines were incubated at 37°C in the presence of 5% CO<sub>2</sub>.

## 22 **CoV spike protein sequence alignment**

1 Amino acid sequences of the S protein used in the alignment were obtained from  
2 UniProKB. The accession numbers are SARS-CoV-2 (P0DTC2), SARS-CoV-1 (P59594),  
3 Bat RaTG13 (A0A6B9WHD3), MERS (K9N5Q8), MHV [A-59] (P11224), HCoV-OC43  
4 (P36334), HCoV-229E (P15423), TGEV (P07946) and IBV (P11223). Alignment of these  
5 sequences was done using Clustal Omega (<https://www.ebi.ac.uk/Tools/msa/clustalo/>).

## 6 **Site-directed mutagenesis**

7 All mutagenesis was done using Q5 Site-directed Mutagenesis Kit Protocol (NEB  
8 #E0554S) according to the manufacturer's instructions using primers in table T1. All  
9 mutagenesis was confirmed with sequencing (GENEWIZ, South Plainfield, NJ).

## 10 **Transfection**

11 For pseudo-typed virus production, HEK293T cells were transfected using the  
12 CalPhos mammalian transfection kit (TaKaRa Clontech) according to the manufacturer's  
13 instructions. For the syncytia formation assay, HEK293T-GFP cells were transiently  
14 transfected with wild-type and mutant spike plasmids using TransIT-X2 transfection  
15 reagent (Mirus #MIR 6000) according to the manufacturer's instructions, and fresh media  
16 was added after 6 hours.

## 17 **SARS-CoV-2 spike pseudotyped virus entry**

18 The assay was done as previously described (62) with minor modification. Briefly,  
19 96-Flat bottom well plates were coated with poly-D-lysine (Gibco, #A3890401) and  
20 seeded with  $1.25 \times 10^4$  HEK293T-ACE2 or Caco-2 cells per each well. After 12 h,  
21 pseudotyped virus with wild-type and mutant spike (with no polybrene) were used for  
22 infection. After 48 hours, Steady-Glo Reagent (Promega #E2620) equal to the volume of  
23 culture medium in each well was added as per manufacturer's instructions, cells were



1 allowed to lyse for 5 minutes and then luminescence measured with a microtiter plate  
2 reader (Biotek, Winooski, VT).

### 3 **Pseudovirus egress**

4 In order to quantitate HIV based pseudovirus egress from HEK293T cells, we  
5 performed ELISA against HIV p24 (TaKaRa Clontech #632200) according to  
6 manufacturer's instructions. Briefly, pseudotyped virus containing cell culture supernatant  
7 was collected, diluted 1:20, ELISA performed and absorbance measured at 450 nm using  
8 a microtiter plate reader (Biotek, Winooski, VT).

### 9 **Immunoblotting**

10 Whole cell lysates were prepared using RIPA Lysis Buffer (Thermo scientific  
11 #89900) supplemented with a protease inhibitor cocktail (Roche# 11836170001) for 30  
12 min on ice and then sonicated three times at an amplitude setting of 50 with pulses of 15s  
13 on and 15s off on a Qsonica Q700 sonicator. The lysates were clarified by centrifugation  
14 at 13,000 X g for 15 min at 4°C. Protein concentrations were estimated using Pierce BCA  
15 protein assay kit (Thermo scientific #23225) as per manufactural instructions and equal  
16 concentration of proteins resolved appropriate SDS PAGE gels. SDS polyacrylamide gels  
17 were transferred on Nitrocellulose membranes (GE) by Wet transfer BioRad System at  
18 300 Amps for 90 min at 4°C, membranes were blocked with 5% non-fat milk for 1 hour at  
19 room temperature (RT) and were incubated with primary antibodies diluted in PBST  
20 solution at 4°C overnight. All primary antibodies used in this study are listed in table T3.  
21 Membranes were washed with PBST for 5 minutes, 3 times and subsequently incubated  
22 with appropriate secondary antibodies. Blots were then washed three times with PBST  
23 for 5 minutes each wash. The immunoreactive bands were developed using Super Signal

1 West Pico chemiluminescent substrate (Thermo scientific #34078) or Super Signal West  
2 Femto chemiluminescent substrate (Thermo scientific #34095) depending on the signal  
3 strength. Blots were developed on a Bio-Rad ChemiDoc XRS+ System.

#### 4 **Co-immunoprecipitation (Co-IP)**

5 Whole cell lysates were prepared using Pierce IP Lysis Buffer (Pierce #87788)  
6 supplemented with a protease inhibitor cocktail for 30 min on ice and then sonicated three  
7 times at an amplitude setting of 30 with pulses of 15s on and 15s off on a Qsonica Q700  
8 sonicator at 4°C. The lysates were then clarified by centrifugation at 13,000 X g for 15  
9 minutes at 4°C and protein concentrations estimated by BCA reaction. For IP, 300 µg of  
10 the prepared lysate was incubated with the appropriate antibody (3 µg) and pulled down  
11 using protein A Sepharose 6MB (GE healthcare # 17-0469-01). All primary antibodies  
12 used in this study are listed in table T3. The immunoprecipitates were washed three times  
13 with lysis buffer at 4°C and resolved on SDS-PAGE followed by immunoblotting.  
14 Wherever mentioned, light-chain-specific secondary antibodies were used to avoid heavy  
15 chain bands in WB of co-IP experiments.

#### 16 ***Acyl-PEGyl Exchange Gel-Shift (APEGS) Assay***

17 To assess the level of protein S-palmitoylation on the SARS-CoV2 spike protein  
18 we did APEGS as described previously (63). In brief, HEK293T cells transfected with  
19 appropriate plasmids were lysed with the following buffer, 4% SDS, 5 mM EDTA, in  
20 triethanolamine buffer (TEA) pH 7.3 with protease inhibitors and PMSF (5 mM). After  
21 centrifugation at 20,000 × g for 15 min, proteins in the supernatant were reduced with 25  
22 mM tris(2-carboxyethyl)phosphine (TCEP, Thermo Scientific, #20490) for 1 hour at RT,  
23 and free cysteine residues were blocked with 20 mM N-ethyl maleimide (NEM, Sigma

1 #E3876) for 3 hours at RT. To terminate the NEM reaction and wash any residual NEM,  
2 pre-chilled methanol: chloroform: H<sub>2</sub>O (4:1.5:3) was added to the reaction. This wash  
3 was repeated three times. Next, the proteins were re-suspended in TEA with 4% SDS  
4 and 5 mM EDTA, then incubated in buffer containing 0.2% Triton X-100, 5 mM EDTA, 1  
5 M NH<sub>2</sub>OH, pH 7.0 for 1 hour at RT to cleave palmitoylation thioester bonds. The reaction  
6 was terminated as above, and proteins re-suspended in TEA with 4% SDS were  
7 PEGylated with 1.33 mM mPEGs (10 kDa, Sunbright, #ME050) for 2 hours at RT to label  
8 palmitoylation sites. The reaction was terminated as above; proteins were re-suspended  
9 with TEA buffer with 4% SDS. Protein concentration was measured by BCA protein  
10 assay. Thereafter, SDS PAGE sample buffer was added and samples were heated at 70  
11 °C for 10 minutes and run on a 7.5% gel for Spike and 12% for GAPDH.

## 12 **Syncytium formation assay**

13 HEK293T-EGFP cells (donor cell) were transiently transfected with wild-type and  
14 mutant spike plasmids using TransIT-X2 transfection reagent (Mirus #MIR 6000).  
15 HEK293T-ACE2 and HEK293T (as a negative control) were stained with CellTracker Red  
16 CMTPX Dye (Invitrogen #C34552) according to manufacturer's instructions. 6 h after  
17 transfection, the HEK293T-ACE2 cells were treated with accutase cell detachment  
18 reagent and added to the HEK293T-EGFP cells transfected with spike protein, at a 1:1  
19 ratio. 48h after transfection, cells were fixed and imaged using Keyence BX700  
20 fluorescent microscope. Images were quantified using ImageJ.

## 21 **Compound Synthesis and Characterization**

22 Bis-piperidines 13 and 25 were synthesized using solid-phase chemistry, purified  
23 by RP-HPLC, and characterized by LCMS and <sup>1</sup>H NMR as previously described (Hamel

1 L. D., et al. 2016). The compounds were additionally recharacterized by LCMS before  
2 performing all biological assays. For LCMS analysis a Shimadzu 2010 LCMS system,  
3 consisting of a LC-20AD binary solvent pumps, a DGU-20A degasser unit, a CTO-20A  
4 column oven, and a SIL-20A HT auto sampler. A Shimadzu SPD-M20A diode array  
5 detector was used for detections. A full spectra range of 190-800 nm was obtained during  
6 analysis. Chromatographic separations were obtained using a Phenomenex Gemini NX-  
7 C18 analytical column (5 µm, 50 x 4.6 mm ID). The column was protected by a  
8 Phenomenex Gemini-NX C18 column SecurityGuard (5 µm, 4 x 3.0 mm ID). All  
9 equipment was controlled and integrated by Shimadzu LCMS solutions software version  
10 3. Mobile phases for LCMS analysis were HPLC grade or LCMS grade obtained from  
11 Sigma Aldrich and Fisher Scientific. The mobile phases consisted of a mixture of LCMS  
12 grade acetonitrile and water (both with 0.1% formic acid for a pH of 2.7). The initial setting  
13 for analysis was at 5% acetonitrile (v/v), linearly increasing to 95% acetonitrile over 6  
14 minutes. The gradient was then held at 95% acetonitrile for 2 minutes until linearly  
15 decreasing to 5% over 1 minute. From there, the gradient was held until stop for an  
16 additional 3 minutes. The total run time was equal to 12 minutes. The total flow rate was  
17 set to 0.5 mL/minute. The column oven and flow cell temperature for the diode array  
18 detector were set at 40°C. The auto sampler temperature was held at 15°C. 10 µl was  
19 injected for analysis.

20 4-(((2S)-1-(2-(4-isobutylphenyl) propyl)-4- (4-((2S)-1-(2-(4- isobutylphenyl) propyl)  
21 piperazin-2- yl) butyl) piperazin-2-yl) methyl) phenol (Compound 13)  
22 OC1=CC=C(C[C@@H]2N(CC(C3=CC=C(CC(C)C)C=C3)C)CCN(CCCC[C@@H]4N(C  
23 C(C5=CC=C(CC(C)C)C=C5)C)CCNC4)C2)C=C1 LCMS (ESI+) Calculated exact mass

1 for C45H68N4O: 680.54 found [M+H]<sup>+</sup>:681.55. Retention Time: 4.78 minutes. 90.1%  
2 purity by 214 nM.

3 4-(((2S)-4-(4-((S)-1-(3,5-bis(trifluoromethyl)phenethyl) piperazin-2-yl) butyl)-1-(2-  
4 (4-isobutylphenyl) propyl) piperazin-2-yl) methyl) phenol (Compound 25)  
5 OC1=CC=C(C[C@@H]2N(CC(C3=CC=C(CC(C)C)C=C3)C)CCN(CCCC[C@@H]4N(C  
6 CC5=CC(C(F)(F)F)=CC(C(F)(F)F)=C5)CCNC4)C2)C=C1 LCMS (ESI<sup>+</sup>) Calculated exact  
7 mass for C42H56F6N4O: 746.44, found [M+H]<sup>+</sup>:747.40. Retention Time: 4.722 minutes.  
8 90.4% purity by 214 nM.

### 9 **Cellular toxicity assay**

10 The XTT Cell Proliferation Kit II (Roche # 11465015001) was used for assessing  
11 cellular toxicity following manufacturer's instruction. DMSO was used as a vehicle for all  
12 compounds and appropriate dilution of DMSO only was used as a control.

### 13 **Gene Silencing**

14 Genes were silenced using siRNAs obtained from IDT, DHHC5 (IDTDNA  
15 #290128941) and DHHC9 (IDTDNA #290128950). For each gene, we used a  
16 combination of three siRNAs. HEK293T cells were seeded on 24 well plate 24 h before  
17 transfection. Transfection of these siRNAs was done using TransIT-X2 (Mirus #MIR 6000)  
18 according to the manufacturer's instructions. Silencing efficacy was checked using qPCR  
19 using SYBR Green real-time reagents (Invitrogen # 4367659) and immunoblotting.

### 20 **RNA extraction and RT-qPCR**

21 Total RNA was isolated using the RNeasy minikit (Qiagen #74106) following  
22 manufacturer's instructions. On-column DNase digestion was performed by using an  
23 RNase-free DNase set (Qiagen #79254). The extracted RNA concentration was

1 estimated using a NanoDrop spectrophotometer (Thermo Scientific), and 1  $\mu$ g RNA was  
2 reverse transcribed by using the High-Capacity cDNA reverse transcription kit (Applied  
3 Biosystems #4368814) with random primers, according to the manufacturer's  
4 instructions. For real-time quantitative reverse transcription-PCR (qRT-PCR), the  
5 synthesized cDNA was diluted 1:20 and used as a template with Power SYBR Green  
6 PCR Master Mix (Applied Biosystems #4367659) on an ABI Prism 7500 detection system  
7 (Applied Biosystems). All RNA levels were normalized to  $\beta$ -actin mRNA levels and  
8 calculated as the delta-delta threshold cycle ( $\Delta\Delta C_T$ ). Primers used in this study are listed  
9 in table T2.

#### 10 **Immunofluorescence assay (IFA) and Proximity Ligation Assay (PLA)**

11 Cells were grown on eight chamber glass slides, and treated as described in the  
12 results. After appropriate incubations, the cells were fixed using 4% paraformaldehyde  
13 for 15 min, and permeabilized with 0.2% Triton X-100 in PBS for 20 min. The slides were  
14 then washed, blocked with Image-iT FX signal enhancer (Invitrogen #136933) for 30  
15 minutes at 37°C and incubated with primary antibodies for 1 h at 37°C. All primary  
16 antibodies used in this study are listed in table T3. After this, the slides were washed three  
17 times in PBS and incubated with corresponding fluorescent dye-conjugated secondary  
18 antibodies for 30 minutes at 37°C. PLA was performed according to the manufacturer's  
19 instructions using the following kits and reagents: Duolink *in-situ* PLA Probe Anti-Rabbit  
20 PLUS (Sigma-Aldrich # DUO92002), Duolink *in-situ* PLA Probe Anti-Mouse MINUS  
21 (Sigma-Aldrich # DUO92004), Duolink *in-situ* Detection Reagents Red (Sigma-Aldrich #  
22 DUO92008). After completion of IFA or PLA, slides were mounted using mounting

1 medium containing DAPI and observed either by a Keyence BZ-X fluorescence  
2 microscope.

### 3 **Surface Immunofluorescence Assay**

4 To detect the amount of spike protein localizing to the surface of the cell, HEK293T  
5 cells were seeded in 8-chamber glass bottomed slides and transfected with appropriate  
6 plasmids. Cells were washed and treated with freshly prepared 0.1% paraformaldehyde  
7 and incubated for 10 minutes at 4°C. Thereafter, the cells were washed two times with  
8 DMEM with 5% FBS and incubated with anti-spike antibody diluted (1:200) in DMEM with  
9 5% FBS and 0.1% Sodium Azide for 1 h at 37°C. Next, cells were washed four times with  
10 DMEM with 5% FBS at 4°C for 10 minutes and incubated with appropriate secondary  
11 antibody (1:500) for 30 minutes at 4°C. Finally, the cells were washed, anti-fade reagent  
12 added and imaged using a Keyence BX700 microscope.

### 13 **SARS-CoV-2 virus stock preparation and titration with plaque-based assays**

14 All replication competent SARS-CoV-2 experiments were performed in a biosafety  
15 level 3 laboratory (BSL-3) at the University of South Florida. All viral stocks were produced  
16 and isolated from supernatants of Vero-E6 ACE2 cells, cultured in T175 culture flasks to  
17 a confluency of 80-90%, and infected with an original passage 2 (P2) SARS-CoV-2 or  
18 SARS-CoV-2-mNG (SARS-CoV-2 stably encoding mNeonGreen) virus, at MOI of 0.1 for  
19 72 h, in 10 ml MEM supplemented with 5% FBS. SARS-CoV-2 was obtained from BEI  
20 Resources (NR52281), while, SARS-CoV-2-mNG was a kind gift from Dr. PEI-Yong Shi  
21 from the University of Texas Medical Branch, Galveston, TX, USA (49). Supernatants  
22 were harvested, cleared of cell debris by centrifugation (500g, 10 min) and filtration (0.45  
23 µm), mixed with 10% SPG buffer (ATCC #MD9692), aliquoted and stored at -80°C. Viral

1 titers were quantified by determining the number of individual plaques forming units after  
2 72 h of infection on confluent Vero-E6-ACE2 expressing cells. In brief, viral stocks were  
3 serially diluted (10-fold) in serum-free medium and inoculated on  $1 \times 10^5$  Vero E6-ACE2  
4 cells in triplicates in a 48 well plate.

### 5 **SARS-CoV-2 infection**

6 All SARS-CoV-2 infections were performed using the same passage 3 SARS-CoV-  
7 2 or SARS-CoV-2-mNG virus stocks. Caco-2 cells seeded to a confluency of 70 to 80%,  
8 were washed twice in warm serum-free medium and inoculated with the indicated MOI of  
9 the appropriate virus, diluted in serum-free medium (5 ml for T75; 2 ml for T25; 1 ml for  
10 6-well plates). Two hours after inoculation cells were washed with complete medium and  
11 infection was allowed to proceed for the indicated time points in DMEM supplemented  
12 with 2.5% FBS. After infection, media with respective drugs were added and incubated  
13 for 72 h. Images were quantified using ImageJ.

### 14 **Drug treatments**

15 For drug treatment, cells were treated with indicated concentrations of 2-BP  
16 (Sigma, #238422) or compounds 13 and 25 dissolved in DMSO, 12 h prior to infection.  
17 Post-infection, cells were continued to be incubated in presence of the respective drugs  
18 for the indicated time.

### 19 **Statistical analysis and reproducibility**

20 Statistical analysis was performed using GraphPad Prism 9 (San Diego, CA). For  
21 two groups, means were compared by two-tailed unpaired Student's t test. For multiple  
22 groups, analysis was done by one-way ANOVA with Dunnett correction for multiple  
23 comparisons. P value of  $< 0.05$  was considered statistically significant. Specific statistical



- 1 test results are indicated in each figure: \*=  $p < 0.05$ ; \*\*=  $p < 0.01$ ; \*\*\*=  $p < 0.001$ ; \*\*\*\*=  $p$
- 2  $< 0.0001$ .

## 1 **Figure Legends**

### 2 **FIGURE 1: Palmitoylation of SARS-CoV-2 spike protein and effect of different** 3 **cysteine clusters mutation of the S protein on pseudotyped lentivirus infection. A.**

4 Sequence alignment of the carboxy-terminal tails of the spike protein from the indicated  
5 coronaviruses. The transmembrane region residues are depicted in blue and the  
6 conserved cysteine residues in the c-terminal cysteine rich domain (CRD) are highlighted  
7 in yellow. The 10 cysteines of the SARS-CoV-2 spike protein (S) CRD were grouped as  
8 four clusters – C1 (C1235, 1236), C2 (C1240, C1241, 1243), C3 (C1247, 1248, 1250)  
9 and C4 (C1253, 1254). Palmitoylation site prediction algorithm predicted 9 of the 10  
10 underlined cysteine residues as potential site of palmitoylation  
11 (<http://csspalm.biocuckoo.org/online.php>). **B.** Plasmids with WT SARS-CoV-2 spike  
12 protein (S) or the indicated cysteine mutants (C1-4 and  $\Delta$ C, where all 10 cysteines are  
13 mutated to serine) were transfected into HEK293T cells and 48 h later, palmitoylation of  
14 the spike protein was assessed by the Acyl-PEGyl Exchange Gel-Shift (APEGS) Assay  
15 using anti-spike protein antibody. Addition of mPEG results in slower migrating species,  
16 indicated by an asterisk (top panel). GAPDH serves as a loading and palmitoylation  
17 control (bottom panel). **C.** Schematic of the luciferase reporter SARS-COV-2 spike  
18 pseudotyped lentivirus system used. **D.** HEK293T-ACE2 or Caco-2 **(E)** cells were infected  
19 with lentivirus pseudotyped with WT spike or its cysteine cluster mutants for 48 h and  
20 pseudovirus infection measured by quantifying the luciferase signal. UI represents  
21 uninfected control. Data shown are relative to the WT pseudovirus and are averages of  
22 the results of at least three independent experiments  $\pm$  SD. (\* $p < 0.05$ ; \*\* $p < 0.01$ ; \*\*\* $p <$   
23  $0.001$ , \*\*\*\* $= p < 0.0001$  (One-Way ANOVA)).

1 **FIGURE 2: Effect of cysteine cluster mutations of SARS-CoV-2 S protein on its**  
2 **trimerization, plasma membrane localization, egress and ACE2 binding. A.** Native  
3 PAGE showing trimeric spike (Tri S), monomeric spike (S) and the S2 fragment of the WT  
4 and different cysteine cluster mutants of the S proteins. Actin is included as loading  
5 control. **B.** Relative normalized intensities of tri S, S and S2 bands in panel A. **C.** Surface  
6 immunofluorescence assay for the S protein was performed by using anti-S protein  
7 antibodies on unpermeabilized HEK293T cells 48 h after transfection with WT or cysteine  
8 cluster mutant S proteins. BF indicates bright field. **D.** HEK293T cells were transfected  
9 with plasmids for SARS-CoV-2 spike pseudotyped lentivirus and 48 h later, supernatant  
10 containing pseudotyped lentivirus particles (WT and cysteine mutants) were assayed for  
11 pseudovirus egress by ELISA against the lentivirus (HIV) p24 protein. **E.** Co-  
12 immunoprecipitation assay. Plasmids expressing WT or different cysteine cluster mutant  
13 S proteins were transfected into HEK293T-ACE2 cells. 48 h after transfection, ACE2 was  
14 immunoprecipitated and the presence of S protein was assayed by immunoblot using  
15 antibody specific to the S1 subunit. ACE2 immunoprecipitation was also confirmed. Inputs  
16 were quantitated by immunoblot (bottom panels).

17 **FIGURE 3: SARS-CoV-2 S protein palmitoylation is required for cell-cell fusion and**  
18 **syncytia formation. A.** Schematic representation of dual fluorescent syncytia formation  
19 assay. HEK293T-EGFP cells were transfected with WT-S or its cysteine mutant plasmids.  
20 After 24 h, cells were detached and mixed with HEK293T-ACE2 cells labeled with cell  
21 tracker red CMPTX dye. After another 24 h, syncytia formation was evaluated by  
22 visualizing the yellow fluorescence formed by the fusion of the green and red cells. **B.**  
23 Dual fluorescent syncytia formation assay with WT-S and S $\Delta$ C and **(C)** quantification of

1 cell-cell fusion ability by measuring the pixel density of the observed syncytia. **D-E.** Same  
2 as in B and C, but, with cysteine cluster mutants of the S protein.

3 **FIGURE 4: Evaluation of DHHC5 and DHHC9 acyltransferases as SARS-CoV-2 spike**  
4 **palmitoylating enzymes. A.** DHHC5 and DHHC9 acyltransferases were knocked down

5 using siRNA for 72 h in HEK293T cells and their respective mRNA levels evaluated by  
6 RT-PCR. **B.** Immunoblots assessing the efficiency of the siRNA knocked down of DHHC5

7 and DHHC9. **C.** APEGS assay to evaluate the role of DHHC5 and DHHC9 on S protein  
8 palmitoylation in HEK293T cells. **D.** HEK293T-ACE2 cells were infected with WT spike

9 protein pseudotyped lentivirus isolated from HEK293T cells treated with control siRNA or  
10 siRNA against DHHC5 or DHHC9. Results are normalized to control siRNA set at 1.0. **E.**

11 HEK293T-ACE2 cells were knocked down for DHHC5 or DHHC9 and 48 h later, infected  
12 with WT spike protein pseudotyped lentivirus derived from untreated HEK293T cells.

13 Further 48 h later, pseudovirus infection was measured by quantifying the luciferase  
14 signal. Data shown are relative to the control siRNA. **F.** Dual fluorescent syncytia

15 formation assay. HEK293T-EGFP cells were transfected with siRNA targeting DHHC5 or  
16 DHHC9 and 48 h later, transfected WT-S plasmids. 24 h later, the cells were detached

17 and mixed with HEK293T-ACE2 cells labeled with cell tracker red CMPTX dye. After  
18 another 24 h, syncytia formation was evaluated by visualizing the yellow fluorescence

19 formed by the fusion of the green and red cells. **G.** Quantification of cell-cell fusion ability  
20 of the data described in (E) by measuring the pixel density of the observed syncytia. All

21 data shown are averages of the results of at least three independent experiments (3 fields  
22 each)  $\pm$  SD. \* $p < 0.05$ ; \*\* $p < 0.01$ ; \*\*\* $p < 0.001$ , \*\*\*\* $p < 0.0001$  (unpaired t test).

1 **FIGURE 5: Interaction of DHHC9 with SARS-CoV-2 spike protein. A.**  
2 Immunoprecipitation of FLAG tagged DHHC9 with spike protein. HEK293T cells were  
3 transfected with either FLAG-DHHC9, or its catalytic inactive mutant of DHHC9 (FLAG-  
4 DHHA9 Mut) and an untagged spike protein and 48 h later, immunoprecipitated with  
5 FLAG antibodies. The respective empty vectors were used as controls. HC, heavy chain  
6 of IgG. **B.** Immunoprecipitation of Myc tagged Golga7 with spike protein. HEK293T cells  
7 were transfected with Myc tagged Golga7 and an untagged spike protein and 48 h later,  
8 immunoprecipitated with anti-Myc antibodies. **C.** Co-localization of spike protein with the  
9 cis-Golgi marker, GM130 or the endoplasmic reticulum marker, Calnexin. Vero-E6-ACE2  
10 cells were infected with SARS-CoV2 (MOI 0.01) and 48 h later, immunostained for the  
11 indicated proteins. **D.** Similar experiment as in (B) showing co-localization between spike  
12 protein and endogenous DHHC5 and DHHC9. **E.** HEK293T cells were transfected with  
13 either untagged spike protein with FLAG-DHHC9 or Myc-Golga7 and 48 h later,  
14 immunostained with anti-FLAG or anti-Myc antibodies together with anti-spike antibodies,  
15 to show co-localization of transfected spike with exogenous DHHC9 and Golga7. **F.**  
16 Proximity ligation assay (PLA) to detect the physical proximity between the spike protein  
17 and FLAG-DHHC9. Experiment was performed as in (D), and PLA was performed with  
18 the indicated antibodies followed by immunofluorescence (IFA) against either GM130 or  
19 Calnexin to visualize the sub-cellular localization of the detected PLA spots. **G.** PLA to  
20 detect the physical proximity between the spike protein and Myc-Golga7. Experiment  
21 same as in F.

22 **FIGURE 6: Effect of DHHC9 knockdown on SARS-CoV-2 infection in Caco-2 cells.**  
23 **A.** Caco-2 cells were knocked down for DHHC5 or DHHC9 and 48 h later, infected with

1 icSARS-CoV-2-mNG (SARSCoV-2 stably encoding mNeonGreen; MOI 0.1). 24, 48 and  
2 72 h post-infection, the cells were fixed, nucleus stained with DAPI and visualized under  
3 a fluorescence microscope. **B.** mNeonGreen signal from (A) was quantitated, normalized  
4 to DAPI and plotted to show the effect of the respective acyltransferase knocked down  
5 on icSARS-CoV-2-mNG infection. All data shown are averages of the results of at least  
6 three independent experiments (3 fields each)  $\pm$  SD. \*= $p < 0.05$ ; \*\*= $p < 0.01$ ; \*\*\*= $p <$   
7  $0.001$ , \*\*\*\*= $p < 0.0001$  (unpaired t test).

8 **FIGURE 7: Inhibition of SARS-CoV-2 infectivity by DHHC9 inhibitors. A.** Chemical  
9 structures of compounds 13 and 25. **B** and **C.** XTT cell viability assay to access the toxicity  
10 of compounds 13 and 25 on HEK293T and Caco-2 cells respectively. Survival is plotted  
11 relative to DMSO, vehicle only control. **D.** APEGS Assay to evaluate the palmitoylation of  
12 the WT-S protein after treatment with compounds 13 and 25. HEK293T cells were treated  
13 with the maximal non-toxic concentration of each compound ( $3\mu\text{M}$ ) or the broad spectrum,  
14 non-specific acyltransferase inhibitor 2-BP ( $10\mu\text{M}$ ) for 12 h before transfection with the  
15 spike plasmid. 48 h later, APEGS assay was performed. DHHC9 independent  
16 palmitoylation of GAPDH is included as a control. **E.** HEK293T-ACE2 cells were  
17 pretreated with either compounds 13 ( $3\mu\text{M}$ ) or 25 ( $3\mu\text{M}$ ) or 2-BP ( $10\mu\text{M}$ ) for 12 h and then  
18 infected with luciferase reporter lentivirus pseudotyped with WT-S protein. Luciferase  
19 activity was measured 48 h later. **F.** HEK293T cells were pretreated with either  
20 compounds 13 ( $3\mu\text{M}$ ), 25 ( $3\mu\text{M}$ ) or 2-BP ( $10\mu\text{M}$ ) for 12 h and then transfected with  
21 plasmids required to produce luciferase reporter lentivirus pseudotyped with WT-S  
22 protein. The pseudovirus collected was used to infect HEK293T-ACE2 cells and  
23 luciferase activity was measured after 48 h. **G.** HEK293T cells were pretreated with

1 compounds 3 (3 $\mu$ M) or 25 (3 $\mu$ M) or 2-BP (10 $\mu$ M) and then transfected with plasmids  
2 required to produce lentivirus pseudotyped with WT-spike protein. 48 h later, the  
3 supernatant containing pseudotyped lentivirus particles were assayed for pseudovirus  
4 egress by ELISA against the HIV p24 protein. **H.** Dual fluorescent syncytia formation  
5 assay. HEK293T-EGFP cells were pretreated with the indicated concentrations of  
6 compounds 13 and 25 for 12 h and then transfected with WT S plasmid. 24 h later, the  
7 cells were detached and mixed with HEK293T-ACE2 cells labeled with cell tracker red  
8 CMPTX dye. Syncytia formation was evaluated at 24 h by visualizing the yellow  
9 fluorescence formed by the fusion of the green and red cells. **I.** Quantification of cell-cell  
10 fusion ability by measuring the pixel density of the observed syncytia in (H). All data  
11 shown are averages of the results of at least three independent experiments  $\pm$  SD. \*= $p$  <  
12 0.05; \*\*= $p$  < 0.01; \*\*\*= $p$  < 0.001, \*\*\*\*= $p$  < 0.0001 (unpaired t test).

13 **FIGURE 8: Compounds 13 and 25 inhibits SARS-CoV-2 infection. A.** Caco-2 cells  
14 were pretreated with the indicated concentrations of compounds 3 and 25 for 12 h and  
15 then infected with icSARS-CoV-2-mNG (MOI 0.1). Post-infection, the cells were  
16 continued to be incubated in the presence of the respective compound dilutions. 72 h  
17 later, the cells were fixed, nucleus stained with DAPI and visualized under a fluorescence  
18 microscope. 10 $\mu$ M 2-BP was also included in this experiment. **B.** mNeonGreen signal  
19 from (J) was quantitated (6 fields from each experiment), normalized to DAPI and plotted  
20 to show the effect of the respective concentrations of the DHHC9 PAT inhibitors on  
21 icSARS-CoV-2-mNG infection. Data shown are averages of the results of at least three  
22 independent experiments  $\pm$  SD (One-way ANOVA) **C.** Caco-2 cells were pretreated with  
23 compounds 13 (3 $\mu$ M), 25 (3 $\mu$ M) or 2-BP (10 $\mu$ M) for 12 h and then infected with SARS-

1 CoV-2 (MOI 0.1). Post-infection, the cells were continued to be incubated in the presence  
2 of the respective compound dilutions. 72 h later, the virus containing supernatants were  
3 collected and used to infect Vero-E6 ACE2 cells. 24 h after this infection, the Vero-E6  
4 ACE2 cells were collected, RNA extracted and the SARS-CoV-2 N gene quantified using  
5 RT-qPCR. UI represents uninfected cells. Data shown are averages of the results of at  
6 least three independent experiments  $\pm$  SD (unpaired t test). \*= $p < 0.05$ ; \*\*= $p < 0.01$ ; \*\*\*= $p$   
7  $< 0.001$ , \*\*\*\*= $p < 0.0001$ .



## Acknowledgements

Funding: This work was supported in part by Public Health Service grant R21 NS090160 to RJD, Public Health Service grant R01 CA180758 to BC, Veterans Affairs Merit Review grant BX005490 and Research Career Scientist Awards IK6BX004212 and IK6BX003778 to SM and SSM.

We gratefully thank the following sources for reagents: The SARS-Related Coronavirus 2, Wuhan-Hu-1 Spike-Pseudotyped Lentiviral Kit was obtained through BEI Resources, NIAID, NIH: SARS-Related Coronavirus 2, Wuhan-Hu-1 Spike-Pseudotyped Lentiviral Kit, NR-52948. Vector pHDM Containing the SARS-Related Coronavirus 2, Wuhan-Hu-1 Spike Glycoprotein was obtained through BEI Resources, NIAID, NIH: Vector pHDM Containing the SARS-Related Coronavirus 2, Wuhan-Hu-1 Spike Glycoprotein, NR-52514. SARS-CoV-2 was deposited by the Centers for Disease Control and Prevention and obtained through BEI Resources, NIAID, NIH: SARS-Related Coronavirus 2, Isolate USA-WA1/2020, NR-52281. SARS-CoV-2-mNG was a kind gift from Dr. PEI-Yong Shi from the University of Texas Medical Branch, Galveston, TX, USA.

## References

1. Hoffmann M, Kleine-Weber H, Schroeder S, Kruger N, Herrler T, Erichsen S, Schiergens TS, Herrler G, Wu NH, Nitsche A, Muller MA, Drosten C, Pohlmann S. 2020. SARS-CoV-2 Cell Entry Depends on ACE2 and TMPRSS2 and Is Blocked by a Clinically Proven Protease Inhibitor. *Cell* 181:271-280 e8.
2. Dai L, Gao GF. 2021. Viral targets for vaccines against COVID-19. *Nat Rev Immunol* 21:73-82.
3. Qing E, Kicmal T, Kumar B, Hawkins GM, Timm E, Perlman S, Gallagher T. 2021. Dynamics of SARS-CoV-2 Spike Proteins in Cell Entry: Control Elements in the Amino-Terminal Domains. *mBio* doi:10.1128/mBio.01590-21:e0159021.
4. Zhou T, Tsybovsky Y, Gorman J, Rapp M, Cerutti G, Chuang GY, Katsamba PS, Sampson JM, Schon A, Bimela J, Boyington JC, Nazzari A, Olia AS, Shi W, Sastry M, Stephens T, Stuckey J, Teng IT, Wang P, Wang S, Zhang B, Friesner RA, Ho DD, Mascola JR, Shapiro L, Kwong PD. 2020. Cryo-EM Structures of SARS-CoV-2 Spike without and with ACE2 Reveal a pH-Dependent Switch to Mediate Endosomal Positioning of Receptor-Binding Domains. *Cell Host Microbe* 28:867-879 e5.
5. Puthenveetil R, Lun CM, Murphy RE, Healy LB, Vilmen G, Christenson ET, Freed EO, Banerjee A. 2021. S-acylation of SARS-CoV-2 Spike Protein: Mechanistic Dissection, In Vitro Reconstitution and Role in Viral Infectivity. *J Biol Chem* doi:10.1016/j.jbc.2021.101112:101112.
6. Wu Z, Zhang Z, Wang X, Zhang J, Ren C, Li Y, Gao L, Liang X, Wang P, Ma C. 2021. Palmitoylation of SARS-CoV-2 S protein is essential for viral infectivity. *Signal Transduct Target Ther* 6:231.
7. Iwanaga T, Tsutsumi R, Noritake J, Fukata Y, Fukata M. 2009. Dynamic protein palmitoylation in cellular signaling. *Prog Lipid Res* 48:117-27.

8. Mitchell DA, Vasudevan A, Linder ME, Deschenes RJ. 2006. Protein palmitoylation by a family of DHHC protein S-acyltransferases. *J Lipid Res* 47:1118-27.
9. Gottlieb CD, Linder ME. 2017. Structure and function of DHHC protein S-acyltransferases. *Biochem Soc Trans* 45:923-8.
10. Lobo S, Greentree WK, Linder ME, Deschenes RJ. 2002. Identification of a Ras palmitoyltransferase in *Saccharomyces cerevisiae*. *J Biol Chem* 277:41268-73.
11. Roth AF, Feng Y, Chen L, Davis NG. 2002. The yeast DHHC cysteine-rich domain protein Akr1p is a palmitoyl transferase. *J Cell Biol* 159:23-8.
12. Blanc M, David FPA, van der Goot FG. 2019. SwissPalm 2: Protein S-Palmitoylation Database. *Methods Mol Biol* 2009:203-214.
13. Linder ME, Deschenes RJ. 2007. Palmitoylation: policing protein stability and traffic. *Nat Rev Mol Cell Biol* 8:74-84.
14. Jiang H, Zhang X, Chen X, Aramsangtienchai P, Tong Z, Lin H. 2018. Protein Lipidation: Occurrence, Mechanisms, Biological Functions, and Enabling Technologies. *Chem Rev* 118:919-988.
15. Veit M. 2012. Palmitoylation of virus proteins. *Biol Cell* 104:493-515.
16. Thorp EB, Boscarino JA, Logan HL, Goletz JT, Gallagher TM. 2006. Palmitoylations on murine coronavirus spike proteins are essential for virion assembly and infectivity. *J Virol* 80:1280-9.
17. Yang J, Lv J, Wang Y, Gao S, Yao Q, Qu D, Ye R. 2012. Replication of murine coronavirus requires multiple cysteines in the endodomain of spike protein. *Virology* 427:98-106.
18. Petit CM, Chouljenko VN, Iyer A, Colgrove R, Farzan M, Knipe DM, Kousoulas KG. 2007. Palmitoylation of the cysteine-rich endodomain of the SARS-coronavirus spike glycoprotein is important for spike-mediated cell fusion. *Virology* 360:264-74.

19. McBride CE, Machamer CE. 2010. Palmitoylation of SARS-CoV S protein is necessary for partitioning into detergent-resistant membranes and cell-cell fusion but not interaction with M protein. *Virology* 405:139-48.
20. Duan L, Zheng Q, Zhang H, Niu Y, Lou Y, Wang H. 2020. The SARS-CoV-2 Spike Glycoprotein Biosynthesis, Structure, Function, and Antigenicity: Implications for the Design of Spike-Based Vaccine Immunogens. *Front Immunol* 11:576622.
21. Stertz S, Reichelt M, Spiegel M, Kuri T, Martinez-Sobrido L, Garcia-Sastre A, Weber F, Kochs G. 2007. The intracellular sites of early replication and budding of SARS-coronavirus. *Virology* 361:304-15.
22. Lontok E, Corse E, Machamer CE. 2004. Intracellular targeting signals contribute to localization of coronavirus spike proteins near the virus assembly site. *J Virol* 78:5913-22.
23. Hoffmann M, Kleine-Weber H, Pohlmann S. 2020. A Multibasic Cleavage Site in the Spike Protein of SARS-CoV-2 Is Essential for Infection of Human Lung Cells. *Mol Cell* 78:779-784 e5.
24. Coutard B, Valle C, de Lamballerie X, Canard B, Seidah NG, Decroly E. 2020. The spike glycoprotein of the new coronavirus 2019-nCoV contains a furin-like cleavage site absent in CoV of the same clade. *Antiviral Res* 176:104742.
25. Hogue IB, Bosse JB, Hu JR, Thiberge SY, Enquist LW. 2014. Cellular mechanisms of alpha herpesvirus egress: live cell fluorescence microscopy of pseudorabies virus exocytosis. *PLoS Pathog* 10:e1004535.
26. Mesquita FS, Abrami L, Sergeeva O, Turelli P, Qing E, Kunz B, Raclot C, Paz Montoya J, Abriata LA, Gallagher T, Dal Peraro M, Trono D, D'Angelo G, van der Goot FG. 2021. S-acylation controls SARS-CoV-2 membrane lipid organization and enhances infectivity. *Dev Cell* doi:10.1016/j.devcel.2021.09.016.
27. Gordon DE, Jang GM, Bouhaddou M, Xu J, Obernier K, White KM, O'Meara MJ, Rezelj VV, Guo JZ, Swaney DL, Tummino TA, Huttenhain R, Kaake RM, Richards AL,

- Tutuncuoglu B, Foussard H, Batra J, Haas K, Modak M, Kim M, Haas P, Polacco BJ, Braberg H, Fabius JM, Eckhardt M, Soucheray M, Bennett MJ, Cakir M, McGregor MJ, Li Q, Meyer B, Roesch F, Vallet T, Mac Kain A, Miorin L, Moreno E, Naing ZZC, Zhou Y, Peng S, Shi Y, Zhang Z, Shen W, Kirby IT, Melnyk JE, Chorba JS, Lou K, Dai SA, Barrio-Hernandez I, Memon D, Hernandez-Armenta C, et al. 2020. A SARS-CoV-2 protein interaction map reveals targets for drug repurposing. *Nature* 583:459-468.
28. Sanders DW, Jumper CC, Ackerman PJ, Bracha D, Donlic A, Kim H, Kenney D, Castello-Serrano I, Suzuki S, Tamura T, Tavares AH, Saeed M, Holehouse AS, Ploss A, Levental I, Douam F, Padera RF, Levy BD, Brangwynne CP. 2021. SARS-CoV-2 requires cholesterol for viral entry and pathological syncytia formation. *Elife* 10.
29. Lee M, Sugiyama M, Mekhail K, Latreille E, Khosraviani N, Wei K, Lee WL, Antonescu C, Fairn GD. 2020. Fatty Acid Synthase inhibition prevents palmitoylation of SARS-CoV2 Spike Protein and improves survival of mice infected with murine hepatitis virus. *bioRxiv* doi:10.1101/2020.12.20.423603:2020.12.20.423603.
30. Santos-Beneit F, Raskevicius V, Skeberdis VA, Bordel S. 2021. A metabolic modeling approach reveals promising therapeutic targets and antiviral drugs to combat COVID-19. *Sci Rep* 11:11982.
31. Gadalla MR, Veit M. 2020. Toward the identification of ZDHHC enzymes required for palmitoylation of viral protein as potential drug targets. *Expert Opin Drug Discov* 15:159-177.
32. Davda D, El Azzouny MA, Tom CT, Hernandez JL, Majmudar JD, Kennedy RT, Martin BR. 2013. Profiling targets of the irreversible palmitoylation inhibitor 2-bromopalmitate. *ACS Chem Biol* 8:1912-7.
33. Chavda B, Arnott JA, Planey SL. 2014. Targeting protein palmitoylation: selective inhibitors and implications in disease. *Expert Opin Drug Discov* 9:1005-19.

34. Hamel LD, Lenhart BJ, Mitchell DA, Santos RG, Giulianotti MA, Deschenes RJ. 2016. Identification of Protein Palmitoylation Inhibitors from a Scaffold Ranking Library. *Comb Chem High Throughput Screen* 19:262-74.
35. Rodenburg RNP, Snijder J, van de Waterbeemd M, Schouten A, Granneman J, Heck AJR, Gros P. 2017. Stochastic palmitoylation of accessible cysteines in membrane proteins revealed by native mass spectrometry. *Nat Commun* 8:1280.
36. Ren J, Wen L, Gao X, Jin C, Xue Y, Yao X. 2008. CSS-Palm 2.0: an updated software for palmitoylation sites prediction. *Protein Eng Des Sel* 21:639-44.
37. Yang J, Gibson B, Snider J, Jenkins CM, Han X, Gross RW. 2005. Submicromolar concentrations of palmitoyl-CoA specifically thioesterify cysteine 244 in glyceraldehyde-3-phosphate dehydrogenase inhibiting enzyme activity: a novel mechanism potentially underlying fatty acid induced insulin resistance. *Biochemistry* 44:11903-12.
38. Cai Y, Zhang J, Xiao T, Peng H, Sterling SM, Walsh RM, Jr., Rawson S, Rits-Volloch S, Chen B. 2020. Distinct conformational states of SARS-CoV-2 spike protein. *Science* 369:1586-1592.
39. Xia S, Lan Q, Su S, Wang X, Xu W, Liu Z, Zhu Y, Wang Q, Lu L, Jiang S. 2020. The role of furin cleavage site in SARS-CoV-2 spike protein-mediated membrane fusion in the presence or absence of trypsin. *Signal Transduct Target Ther* 5:92.
40. Huang Y, Yang C, Xu XF, Xu W, Liu SW. 2020. Structural and functional properties of SARS-CoV-2 spike protein: potential antivirus drug development for COVID-19. *Acta Pharmacol Sin* 41:1141-1149.
41. Scudellari M. 2021. How the coronavirus infects cells - and why Delta is so dangerous. *Nature* 595:640-644.
42. Swarthout JT, Lobo S, Farh L, Croke MR, Greentree WK, Deschenes RJ, Linder ME. 2005. DHHC9 and GCP16 constitute a human protein fatty acyltransferase with specificity for H- and N-Ras. *J Biol Chem* 280:31141-8.

43. Ohta E, Misumi Y, Sohda M, Fujiwara T, Yano A, Ikehara Y. 2003. Identification and characterization of GCP16, a novel acylated Golgi protein that interacts with GCP170. *J Biol Chem* 278:51957-67.
44. Chen JJ, Marsden AN, Scott CA, Akimzhanov AM, Boehning D. 2020. DHHC5 Mediates beta-Adrenergic Signaling in Cardiomyocytes by Targeting Galpha Proteins. *Biophys J* 118:826-835.
45. Woodley KT, Collins MO. 2019. S-acylated Golga7b stabilises DHHC5 at the plasma membrane to regulate cell adhesion. *EMBO Rep* 20:e47472.
46. Fredriksson S, Gullberg M, Jarvius J, Olsson C, Pietras K, Gustafsdottir SM, Ostman A, Landegren U. 2002. Protein detection using proximity-dependent DNA ligation assays. *Nat Biotechnol* 20:473-7.
47. Tsukamoto H, Tousson A, Circolo A, Marchase RB, Volanakis JE. 2002. Calnexin is associated with and induced by overexpressed human complement protein C2. *Anat Rec* 267:7-16.
48. Myhill N, Lynes EM, Nanji JA, Blagoveshchenskaya AD, Fei H, Carmine Simmen K, Cooper TJ, Thomas G, Simmen T. 2008. The subcellular distribution of calnexin is mediated by PACS-2. *Mol Biol Cell* 19:2777-88.
49. Xie X, Muruato A, Lokugamage KG, Narayanan K, Zhang X, Zou J, Liu J, Schindewolf C, Bopp NE, Aguilar PV, Plante KS, Weaver SC, Makino S, LeDuc JW, Menachery VD, Shi PY. 2020. An Infectious cDNA Clone of SARS-CoV-2. *Cell Host Microbe* 27:841-848 e3.
50. Draper JM, Smith CD. 2009. Palmitoyl acyltransferase assays and inhibitors (Review). *Mol Membr Biol* 26:5-13.
51. Coleman RA, Rao P, Fogelsong RJ, Bardes ES. 1992. 2-Bromopalmitoyl-CoA and 2-bromopalmitate: promiscuous inhibitors of membrane-bound enzymes. *Biochim Biophys Acta* 1125:203-9.

52. Chase JF, Tubbs PK. 1972. Specific inhibition of mitochondrial fatty acid oxidation by 2-bromopalmitate and its coenzyme A and carnitine esters. *Biochem J* 129:55-65.
53. Pedro MP, Vilcaes AA, Tomatis VM, Oliveira RG, Gomez GA, Daniotti JL. 2013. 2-Bromopalmitate reduces protein deacylation by inhibition of acyl-protein thioesterase enzymatic activities. *PLoS One* 8:e75232.
54. Bentz J, Mittal A. 2003. Architecture of the influenza hemagglutinin membrane fusion site. *Biochim Biophys Acta* 1614:24-35.
55. Luo Z, Matthews AM, Weiss SR. 1999. Amino acid substitutions within the leucine zipper domain of the murine coronavirus spike protein cause defects in oligomerization and the ability to induce cell-to-cell fusion. *J Virol* 73:8152-9.
56. Chang KW, Sheng Y, Gombold JL. 2000. Coronavirus-induced membrane fusion requires the cysteine-rich domain in the spike protein. *Virology* 269:212-24.
57. Wrapp D, Wang N, Corbett KS, Goldsmith JA, Hsieh CL, Abiona O, Graham BS, McLellan JS. 2020. Cryo-EM structure of the 2019-nCoV spike in the prefusion conformation. *Science* 367:1260-1263.
58. Shulla A, Gallagher T. 2009. Role of spike protein endodomains in regulating coronavirus entry. *J Biol Chem* 284:32725-34.
59. Abdulrahman DA, Meng X, Veit M. 2021. S-Acylation of Proteins of Coronavirus and Influenza Virus: Conservation of Acylation Sites in Animal Viruses and DHHC Acyltransferases in Their Animal Reservoirs. *Pathogens* 10.
60. Li D, Liu Y, Lu Y, Gao S, Zhang L. 2021. Palmitoylation of SARS-CoV-2 S protein is critical for S-mediated syncytia formation and virus entry. *J Med Virol* doi:10.1002/jmv.27339.
61. Dull T, Zufferey R, Kelly M, Mandel RJ, Nguyen M, Trono D, Naldini L. 1998. A third-generation lentivirus vector with a conditional packaging system. *J Virol* 72:8463-71.
62. Crawford KHD, Eguia R, Dingens AS, Loes AN, Malone KD, Wolf CR, Chu HY, Tortorici MA, Veessler D, Murphy M, Pettie D, King NP, Balazs AB, Bloom JD. 2020. Protocol and



Reagents for Pseudotyping Lentiviral Particles with SARS-CoV-2 Spike Protein for Neutralization Assays. *Viruses* 12.

63. Percher A, Thinon E, Hang H. 2017. Mass-Tag Labeling Using Acyl-PEG Exchange for the Determination of Endogenous Protein S-Fatty Acylation. *Curr Protoc Protein Sci* 89:14 17 1-14 17 11.
64. McClafferty H, Shipston MJ. 2019. siRNA Knockdown of Mammalian zDHCs and Validation of mRNA Expression by RT-qPCR. *Methods Mol Biol* 2009:151-168.
65. Corman VM, Landt O, Kaiser M, Molenkamp R, Meijer A, Chu DK, Bleicker T, Brunink S, Schneider J, Schmidt ML, Mulders DG, Haagmans BL, van der Veer B, van den Brink S, Wijsman L, Goderski G, Romette JL, Ellis J, Zambon M, Peiris M, Goossens H, Reusken C, Koopmans MP, Drosten C. 2020. Detection of 2019 novel coronavirus (2019-nCoV) by real-time RT-PCR. *Euro Surveill* 25.

**Table T1**

Mutagenic primers used

| Primer | Sequence                                           | Source     |
|--------|----------------------------------------------------|------------|
| C1_F   | TATAATGCTGAGCAGCATGACAAGCTG                        | This Study |
| C1_R   | GTCACCATGACTATAGCG                                 | This Study |
| C2_F   | AGCAGTCTCAAAGGCTGTTGCTCTTG                         | This Study |
| C2_R   | GCTGCTGCTTGTCATGCAGCACAG                           | This Study |
| C3_F   | TCTAGCGGCTCTTGCTGCAAATTC                           | This Study |
| C3_R   | GCTACTGCCTTTGAGACAGCTGCA                           | This Study |
| C4_F   | TTGCGGCTCTAGCAGCAAATTCGATG                         | This Study |
| C4_R   | GAGCAACAGCCTTTGAGAC                                | This Study |
| ΔC_F   | AAAGGCAGTAGCTCTAGCGGCTCTAGCAGCAAATTCGATGAGGACGATTC | This Study |
| ΔC_R   | GAGACTGCTGCTGCTGCTTGTCATGCTGCTCAGCATTATAGTCACCATG  | This Study |

**Table T2**

Real-time primers used

| Primer       | Sequence1              | Sequence2               | Source |
|--------------|------------------------|-------------------------|--------|
| DHHC1        | CAAGCCCTCCAACAAGACG    | CCAAAGCCGATCACAGCAAAG   | (64)   |
| DHHC2        | AACACTGGCGAACAAGTTGTG  | AGATGGGAAGATCCTTGGCTG   | (64)   |
| DHHC3        | CCACTTCCGAAACATTGAGCG  | CCACAGCCGTCACGGATAAA    | (64)   |
| DHHC4        | CCTGACTTGTGGAACCAATCC  | GCACCTCACGTTCTTTGGAAAC  | (64)   |
| DHHC5        | CACCTGCCGCTTTTACCGT    | CGGCGACCAATACAGTTATTCAC | (64)   |
| DHHC6        | AGTCTGCCAAGCATACAAGGC  | CCAGTGGTGCTAAAAGGAGAAAC | (64)   |
| DHHC7        | CTGACCGGGTCTGGTTCATC   | CATGACGAAAGTCACCACGAA   | (64)   |
| DHHC8        | GTATCCAGGTCCGCATGAAGT  | AGCGTGGTTCAGCACGTAG     | (64)   |
| DHHC9        | CCCAGGCAGGAACACCTTTT   | CCGAGGAATCACTCCAGGG     | (64)   |
| DHHC11       | GGTGCAGACCCTGATAGTCG   | GCACGTATGGATCTTTCCTCAC  | (64)   |
| DHHC12       | GTGCTGACCTGGGAATCAC    | CTGCACATTCACGTAGCCA     | (64)   |
| DHHC13       | ACCCCACTCTTATTGATGGAGA | TGTCTGCCCATTTACATCTGTC  | (64)   |
| DHHC14       | TGTGATAACTGCGTAGAACGGT | CGTGGGTGATAACGAATGCAA   | (64)   |
| DHHC15       | GGTGCCAGTGCTCGTTATTGT  | AAGACGTAGGCATAGTAGGACC  | (64)   |
| DHHC16       | ACTCCGGGGTCTAGTACAGC   | CCAGCGGATCACGTTGTCT     | (64)   |
| DHHC17       | GGCCCGGATGAGTACGATAC   | TCCAAGAGGTTCCACCATATCCA | (64)   |
| DHHC18       | TGACGGCCTTCATCTTCGC    | CTGGACCACGAGCCTTTGAT    | (64)   |
| DHHC19       | TTGCTGCCTTCAATGTGGTG   | CGGAGCCTTGATGTAAGATGC   | (64)   |
| DHHC20       | CGCACCCACGTTTTCATACG   | TCTGGCATACTCATTCTGGTTTG | (64)   |
| DHHC21       | TGTTGTTGACCCACATGGTTG  | GAGGCCCTCACTAAGGCAA     | (64)   |
| DHHC22       | GAGGCACGACCATCACTGTTT  | ACAGCGGAGATGTAGGCCA     | (64)   |
| DHHC23       | TCTGGATGAAGGGTGTGATCG  | GCTCCCCTAAGCCAAGGAA     | (64)   |
| DHHC24       | CTGGCACAGTTTGCCTTGG    | CAGGGACCCAGGTCATAGGAG   | (64)   |
| SARS-CoV-2 N | CACATTGGCACCCGCAATC    | GAGGAACGAGAAGAGGCTTG    | (65)   |

**Table T3**

Primary antibodies used

| <b>Antibody</b> | <b>Source</b>   | <b>Catalog Number</b> |
|-----------------|-----------------|-----------------------|
| Spike S2        | GeneTex         | GTX632604             |
| Spike S1        | Sino Biological | 40591-MM42            |
| ACE2            | Novus           | NBP2-67692            |
| GAPDH           | Santa Cruz      | sc-47724              |
| Calnexin        | Novus           | NB300-518             |
| Calnexin        | Cell Signaling  | 2679P                 |
| FLAG            | Sigma-Aldrich   | F1804                 |
| FLAG            | Sigma-Aldrich   | F7425                 |
| MYC             | Cell Signaling  | 71D10                 |
| MYC             | Cell Signaling  | 9B11                  |
| DHHC9           | Sigma-Aldrich   | HPA031814             |
| DHHC5           | Sigma-Aldrich   | HPA014670             |
| $\beta$ -Actin  | Protein-tech    | HRP-60008             |
| GM130           | Invitrogen      | PA5-95727             |
| GM130           | R&D             | AF8199                |

**Figure 1**

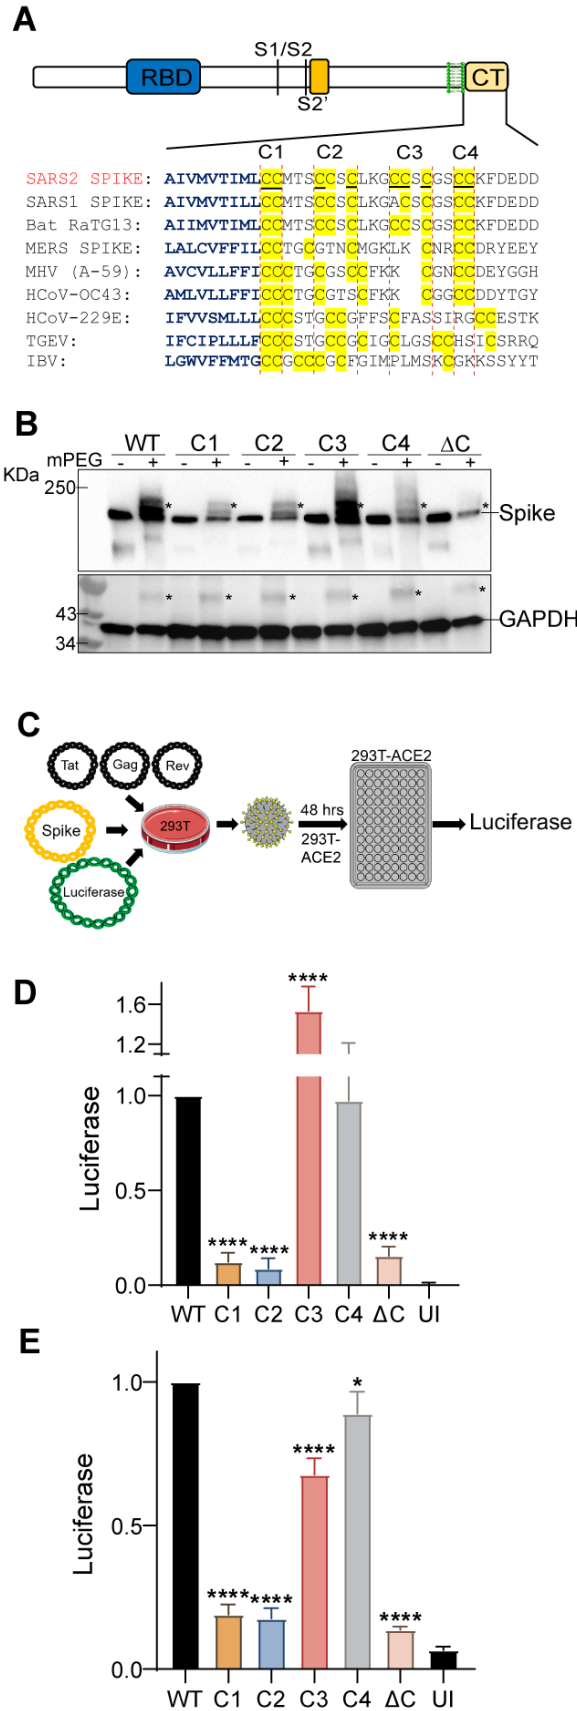

**Figure 2**

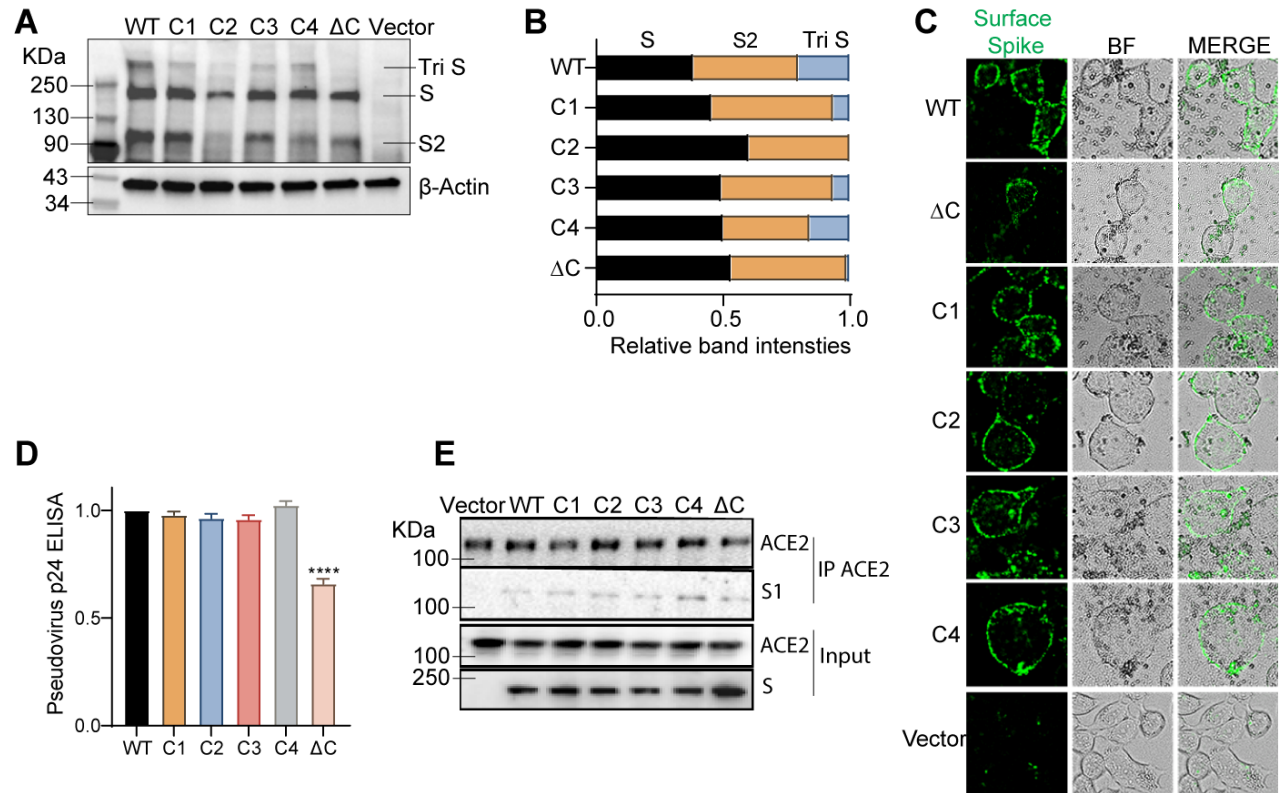

**Figure 3**

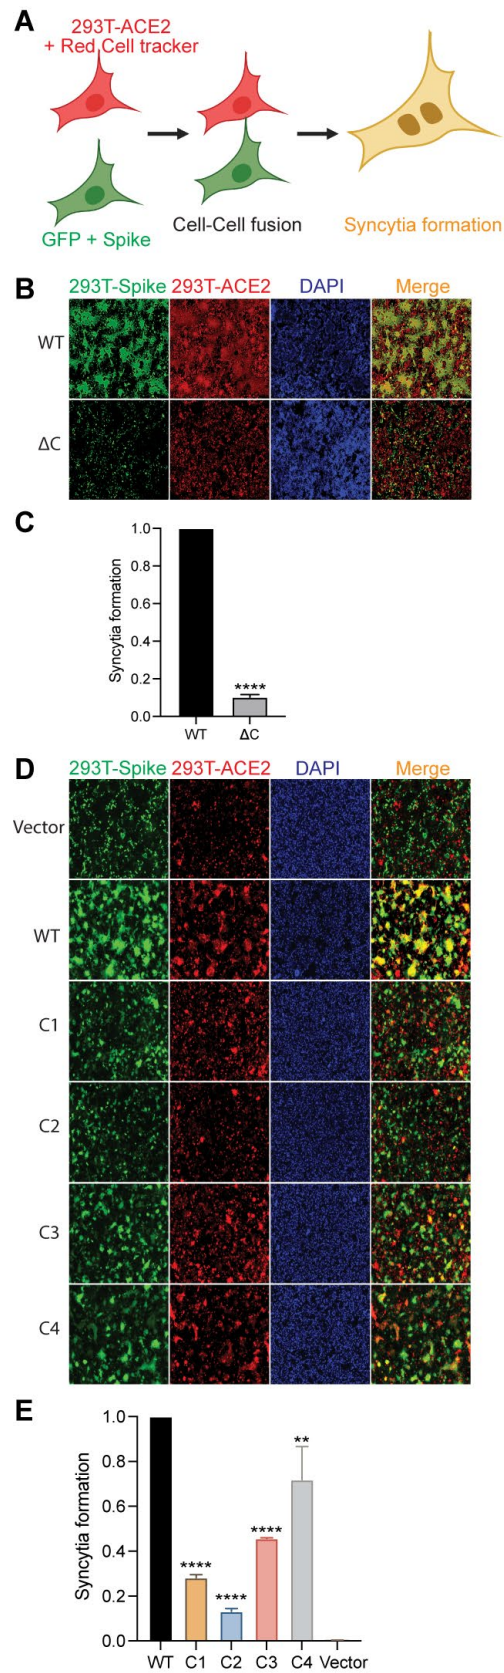

**Figure 4**

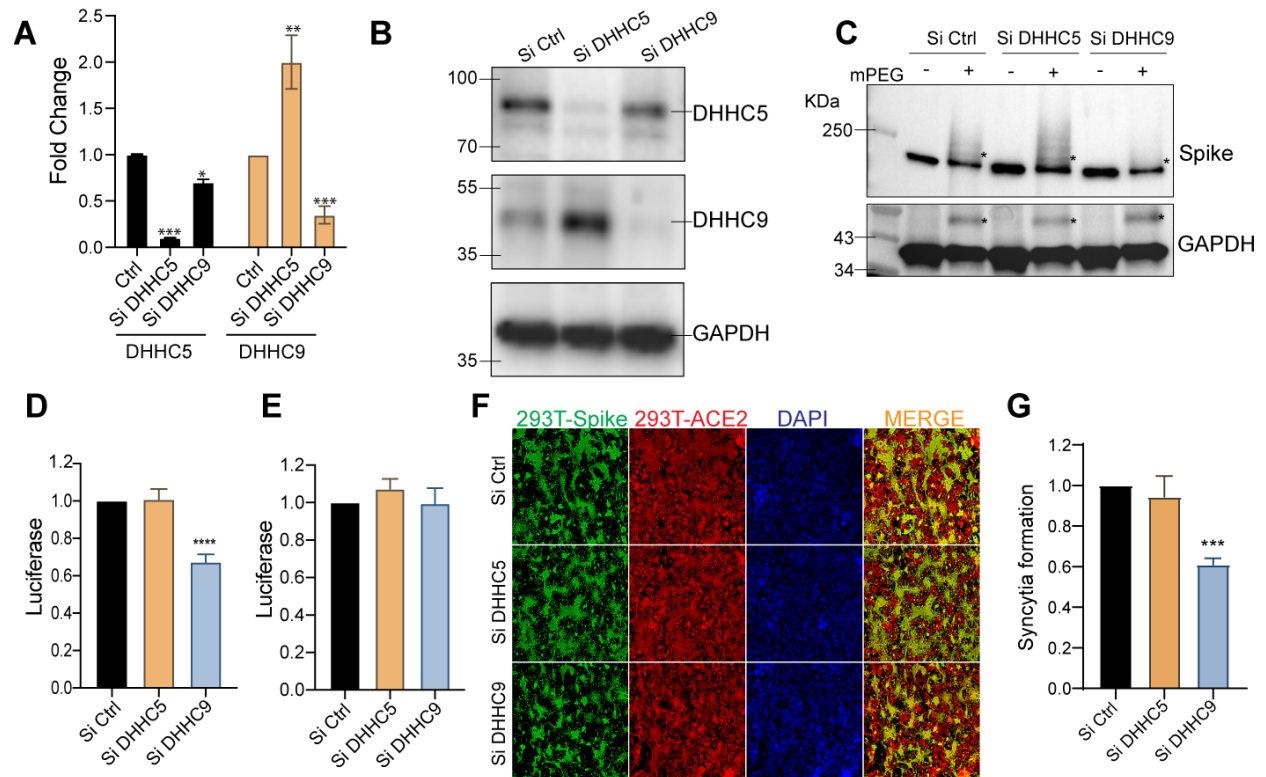

**Figure 5**

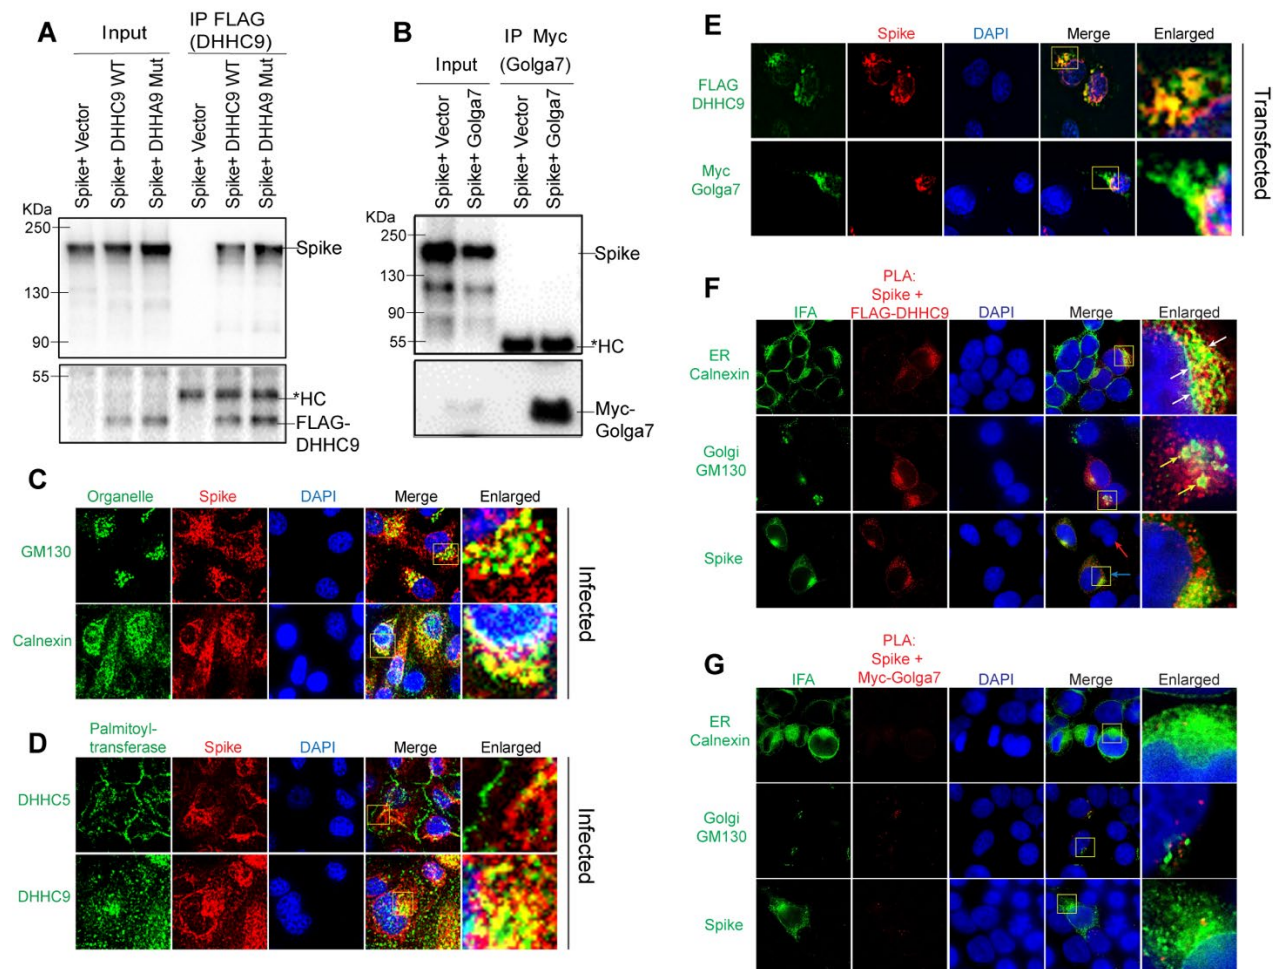



**Figure 6**

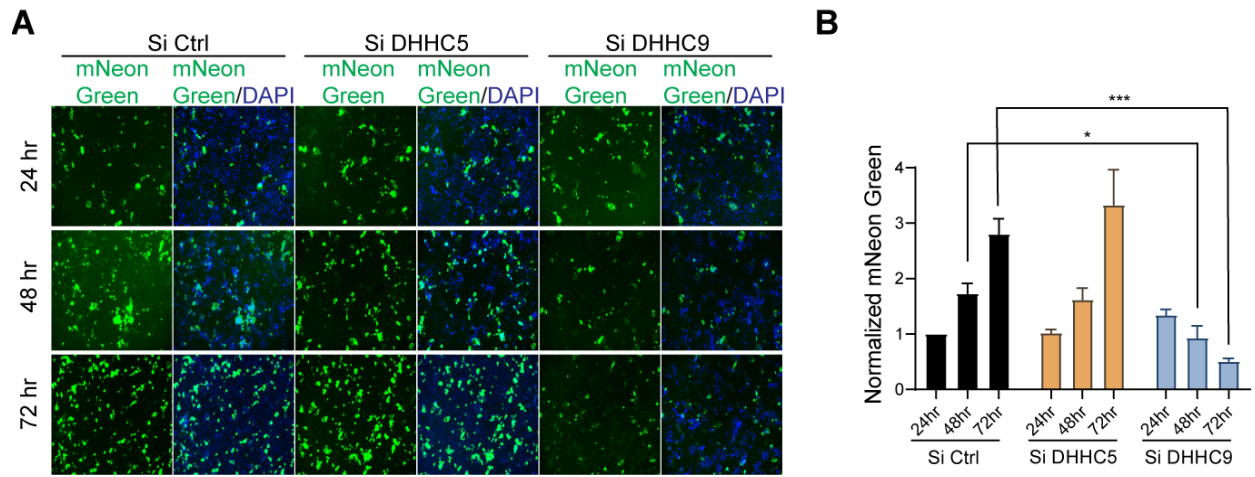

**Figure 7**

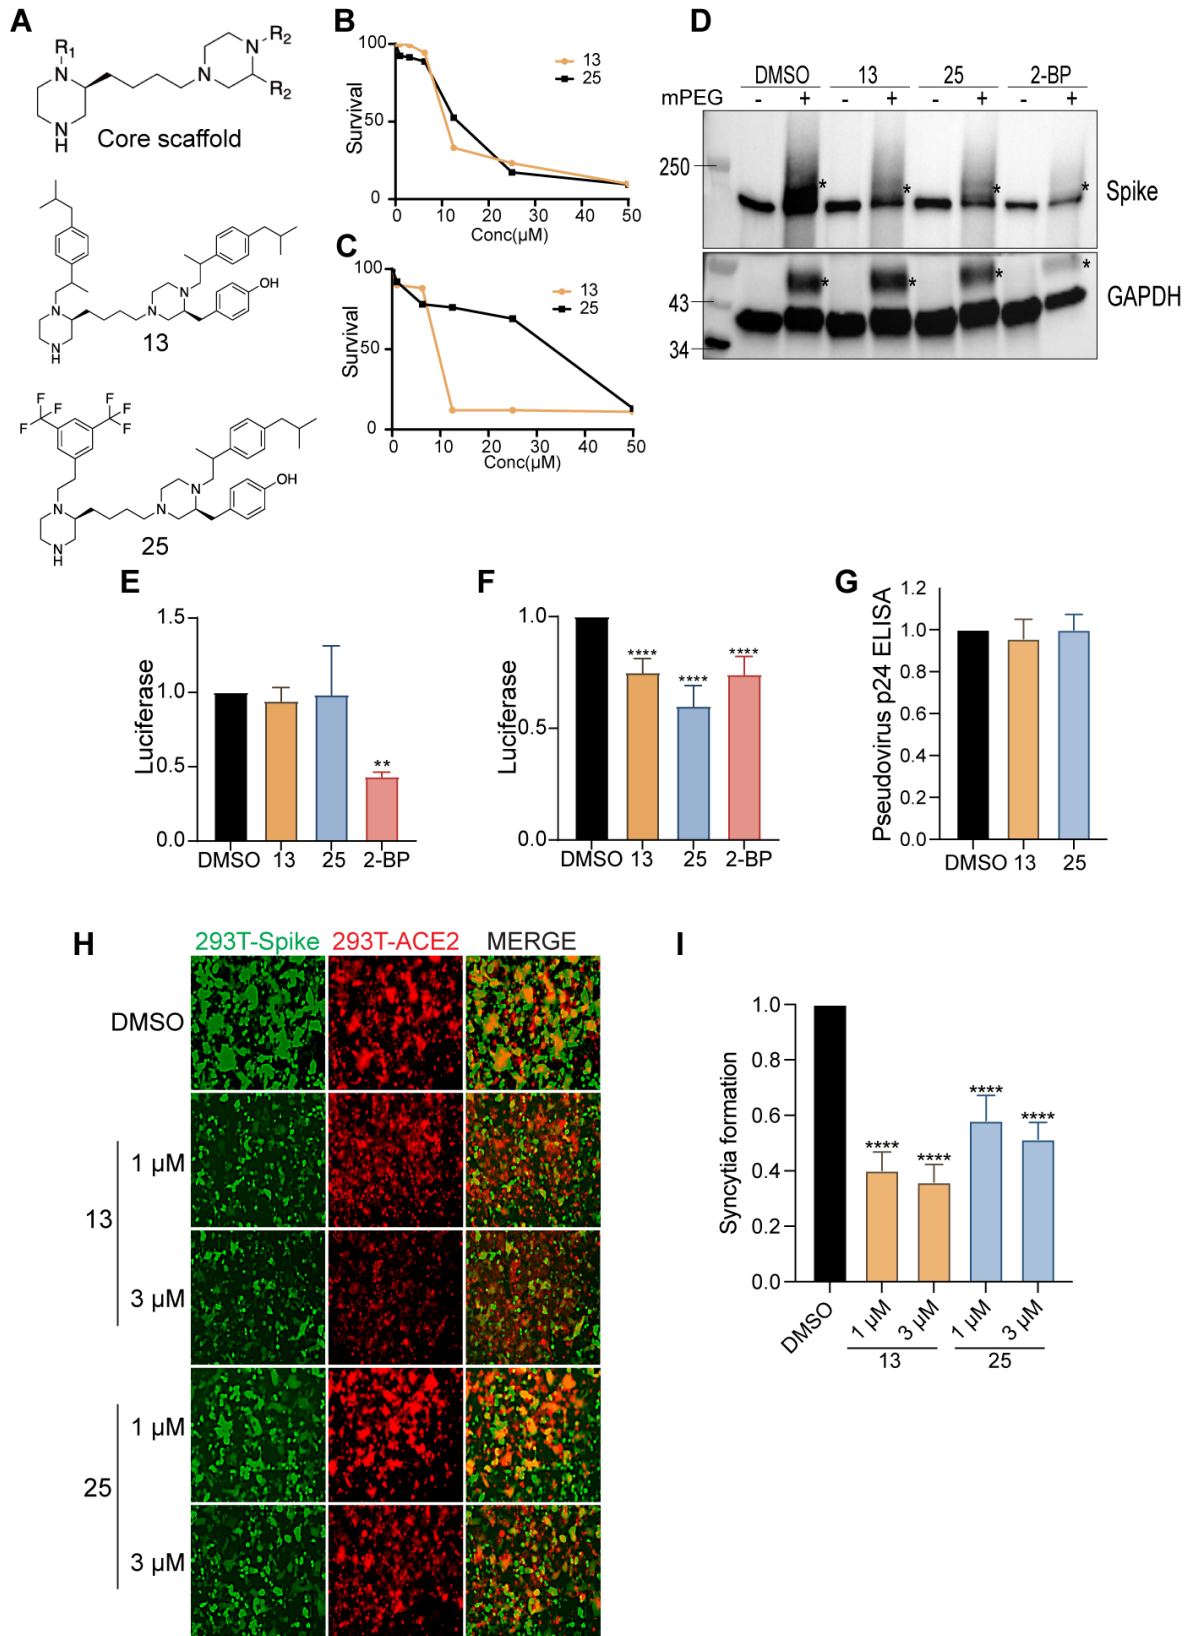

**Figure 8**

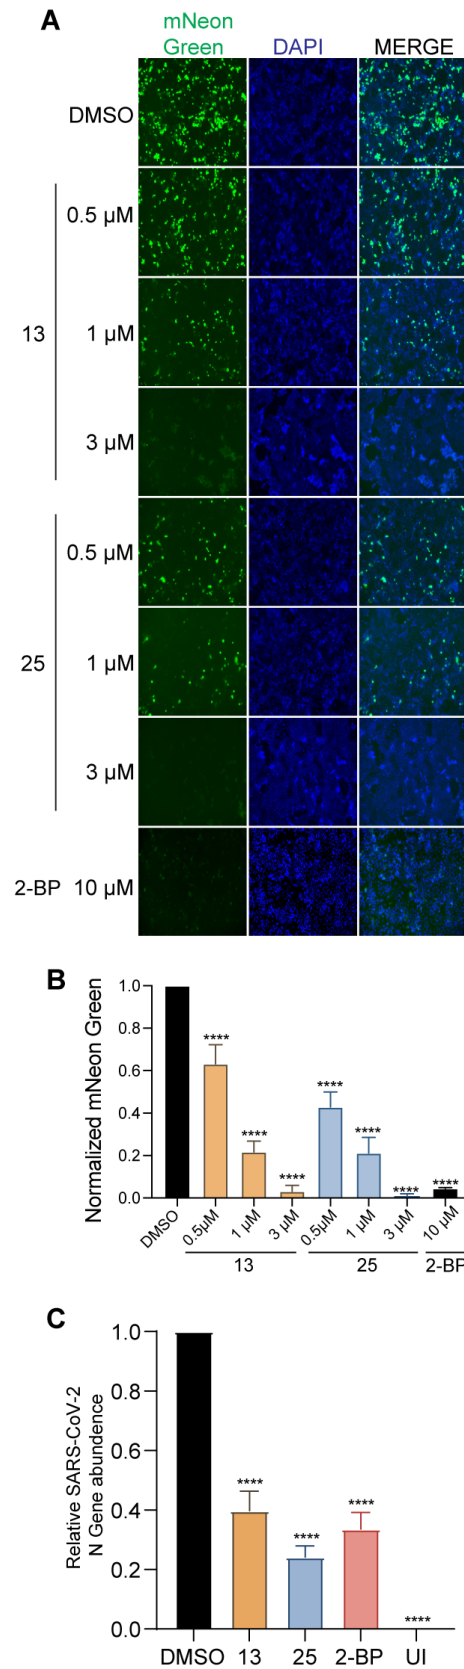

## Supplementary information

Fig. S1

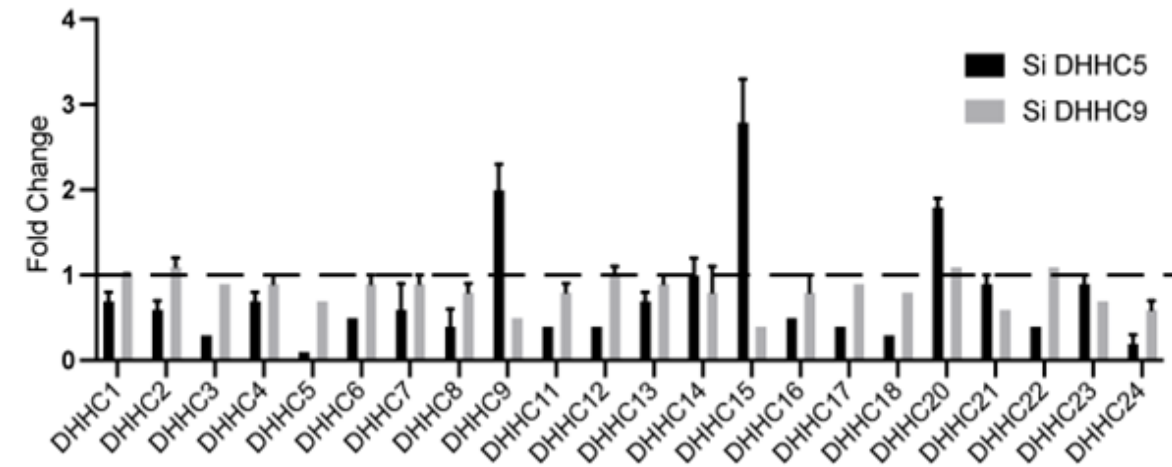

**Fig S1:** DHC5 and DHC9 acyltransferases were knocked down using siRNA for 72 h in HEK293T cells and the indicated acyltransferase mRNA levels were evaluated by RT-PCR.

**Fig. S2**

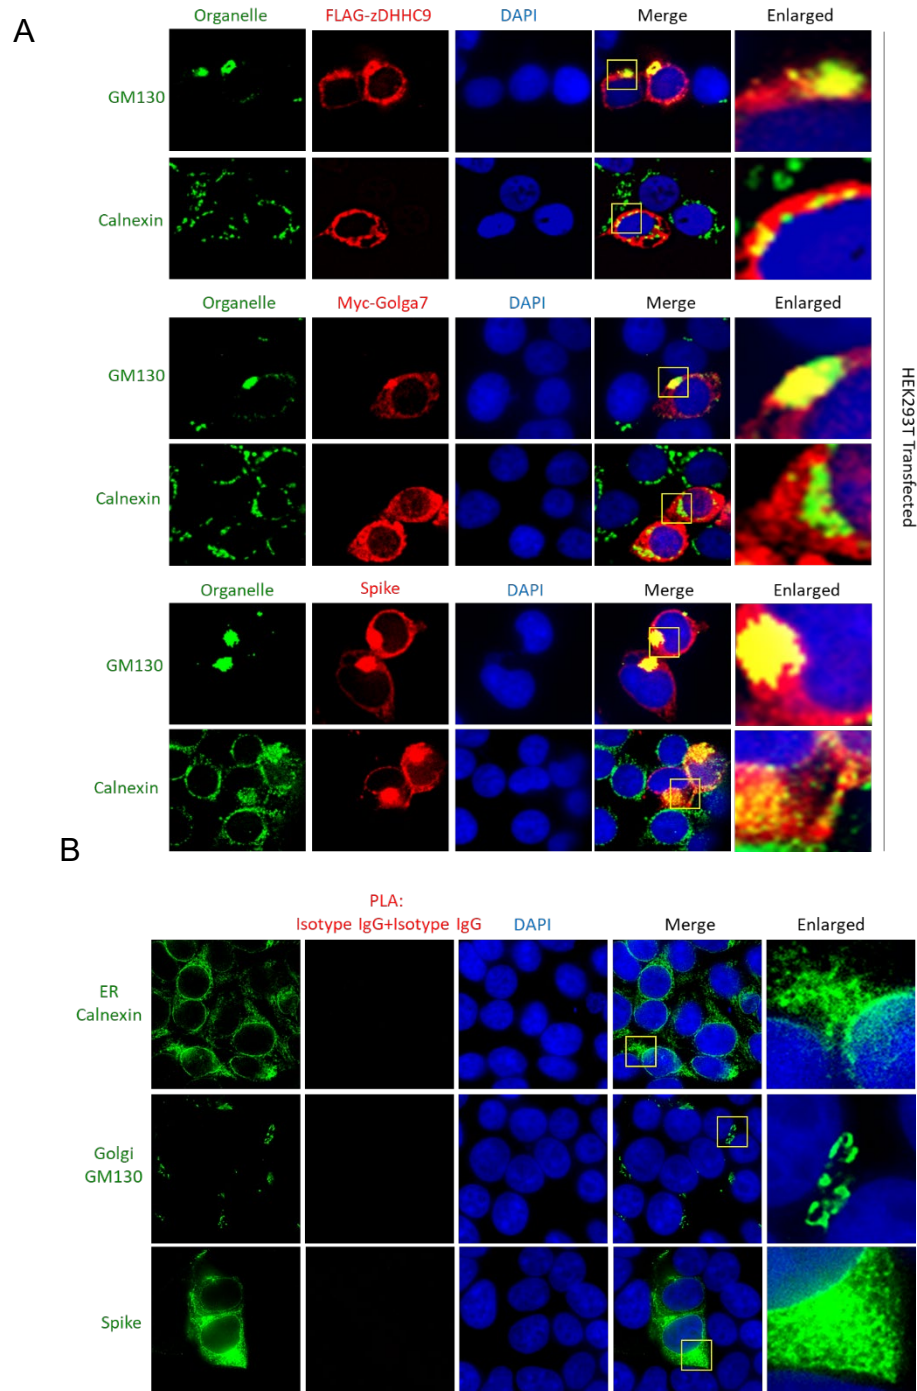

**Fig S2: A.** Co-localization of FLAG-DHHC9, Myc-Golga7 and spike protein with the cis-Golgi marker, GM130 or the endoplasmic reticulum marker, Calnexin. HEK293T2 cells were transfected with the indicated plasmids and 72 h later, immunostained for the indicated proteins. **B.** Control PLA with isotype IgGs showing absence of non-specific PLA signal.

**Fig. S3**

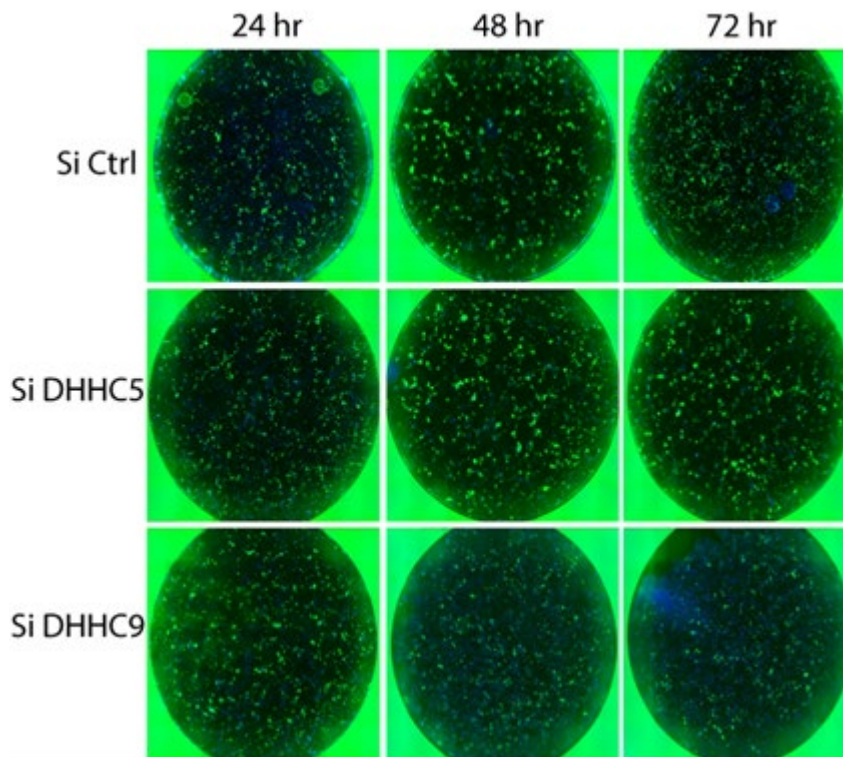

**Fig S3:** Supplemental image to Fig. 6A. Images of the entire well of the 96 well plate is provided to forego any bias in the region of interest photographed.

**Fig. S4**

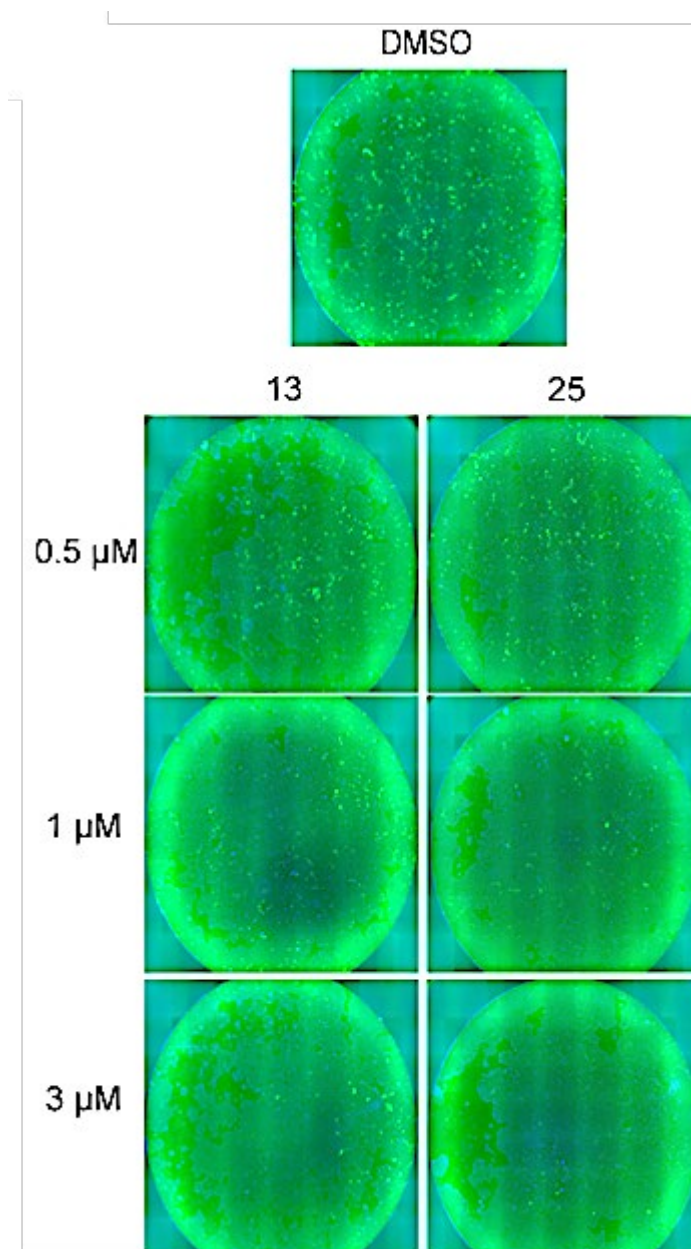

**Fig S4:** Supplemental image to Fig. 8A. Images of the entire well of the 96 well plate is provided to forego any bias in the region of interest photographed.
